# Supplementary material for: SoxC transcription factors shape the epigenetic landscape to establish competence for sensory differentiation in the mammalian organ of Corti
Source: PubMed Central journal article supplement — Proc Natl Acad Sci U S A. 2023 Aug 16;120(34):e2301301120. doi: 10.1073/pnas.2301301120 (PMC10450657; doi:10.1073/pnas.2301301120), 2023-08-16
Supplement: pnas.2301301120.sapp.pdf [file pnas.2301301120.sapp.pdf]

## Supporting Information for

SoxC transcription factors shape the epigenetic landscape to establish competence for sensory differentiation in the mammalian organ of Corti.

Xizi Wang<sup>1,2</sup>, Juan Llamas<sup>1,2</sup>, Talon Trecek<sup>1,2</sup>, Tuo Shi<sup>2</sup>, Litao Tao<sup>1,2</sup>, Welly Makmura<sup>1,2</sup>, J. Gage Crump<sup>2</sup>, Neil Segil<sup>1,2,3</sup>, and Ksenia Gnedeva<sup>1,2,\*</sup>

<sup>1</sup> USC Caruso Department of Otolaryngology – Head and Neck Surgery, and

<sup>2</sup> Department of Stem Cell Biology and Regenerative Medicine, Keck School of Medicine of University of Southern California

<sup>3</sup> Deceased

\* to whom correspondence may be addressed

Email: [gnedeva@usc.edu](mailto:gnedeva@usc.edu)

### This PDF file includes:

Supporting text  
Figures S1 to S7  
Legends for Datasets S1 to S3  
SI References

### Other supporting materials for this manuscript include the following:

Datasets S1 to S3

## 31 Materials and Methods

### 32 33 Primary cochlear progenitor and supporting cell isolation and cultures

34 Organotypic cochlear cultures were described previously (1). Briefly, cochleae were dissected at  
35 E12.0 and E13.5 from *Atoh1*-GFP mice. Isolated organs were placed in 400 ul collagen matrix containing  
36 100ul collagen I gel solution (Sigma), 70 ul 0.9M sodium bicarbonate (Sigma), 133 ul 0.34M sodium  
37 hydroxide (Sigma), 40 ul 1M 4(2hydroxyethyl)-1 piperazineethanesulfonic acid (HEPES), and 50 ul 10x  
38 PBS. After embedding the organs and gel solidification, the wells were flooded with 500 ul of hair cell  
39 medium containing DMEM-F12, N2, B27, 20mg/L epidermal growth factor, 20mg/L fibroblast growth  
40 factor, 15mM HEPES, and Insulin Transferin-sodium Selenite.

41 For E12.0-14.5 cultures, single-cell suspension was acquired from micro-dissected cochlear  
42 ducts. Inner ears were first dissected in sterile PBS and enzymatically digested for 10 min at RT in 0.25%  
43 dispase (Gibco)/0.25% collagenase I (Gibco) diluted in DMEM. Ears were then transferred to a new dish  
44 field with sterile PBS and epithelial cochlear ducts were dissected and further enzymatically digested for  
45 10 min at 37°C with 0.125% Trypsin-EDTA (Sigma). Enzymatic reaction was stopped by adding 10% FBS  
46 (Sigma) and cells were spun down for 5 min at 300 RCF at 4 °C. Cells were plated onto 10% Matrigel-  
47 coated (Sigma) 96-well tissue culture plates and cultured in the hair cell medium for 2-3 days.

48 For P6 cultures, cochlear ducts were dissected and enzymatically digested for 10 min at 37°C  
49 with 0.125% Trypsin-EDTA (Sigma). FBS was added to stop the reaction and cells were dissociated into  
50 single-cell suspension by trituration for 5 minutes. Cells were then filtered through 40µm cell strainer (BD  
51 Biosciences) to remove residual undissociated ECM and Lfng-GFP positive supporting cells were isolated  
52 via FACS. To improve cell survival, cells were collected directly into hair cell medium containing ROCK  
53 Inhibitor (Y-27632; Sigma). Supporting cells were mixed with peri-otic mesenchyme (2) and plated onto  
54 poly-D-lysine- (0.5 mg/ml; Sigma) and fibronectin- (25 ug/ml; Gibco) coated cover slips.

55 For both embryonic and postnatal primary cell cultures, cells were infected with Adenovirus Type  
56 5 (Ad5) containing the full-length coding sequence of *RFP*, *Sox4-IRES-RFP*, *Sox11-IRES-RFP*, *Sox2-*  
57 *IRES-RFP*, or *Atoh1-IRES-RFP*. The medium containing virus was replaced after 24hr with fresh hair cell  
58 medium.

### 59 60 Immunohistochemistry and RNA *in situ* hybridization.

61 For whole-mount organ staining, cochlea ducts were obtained as described above and fixed for 30  
62 min in 4% paraformaldehyde. Organs were blocked for 4 hrs at room temperature using the normal  
63 donkey serum blocking buffer containing 20 mM Tris-Buffered Saline (10x TBS; Bio-Rad), 0.1% Tween-  
64 20 (Sigma-Aldrich), and 5% normal donkey serum (Sigma-Aldrich). The primary antibodies were diluted in  
65 the same blocking buffer and incubated overnight at 4 °C. Primary antibodies used include goat anti-Sox2  
66 (Invitrogen), rabbit anti-Myo7A (Proteus Bioscience), chicken anti-GFP (Abcam), rabbit anti-GFP (Torrey  
67 Pines Biolabs), guinea pig anti-Sox4 (3). Samples were washed with 20 mM TBS supplemented with  
68 0.1% Tween 20 (Sigma-Aldrich) (TBST) 3 times, 5 min each. Secondary antibodies conjugated to Alexa  
69 Fluor dyes (Life Technologies) were diluted in TBST for 2hr at room temperature or at 4 °C overnight. 3  
70 µM DAPI (Sigma-Aldrich) were used for nuclei labeling.

71 For cryo-sections, the whole inner ears were dissected and fixed using 4% paraformaldehyde for 45  
72 min at RT or overnight at 4°C. Tissue was then transferred to 30% sucrose in PBS overnight at 4°C,  
73 embedded in Tissue-Tek O.C.T. (Sakura), and snap frozen on dry ice. Cryo-sections at 12 µm thickness  
74 were obtained using cryostats and kept at room temperature for 24hr. For immunohistochemistry, if  
75 necessary, antigen retrieval was performed in the citrate acid buffer for 5 min at 95°C. Sections were then  
76 blocked using the previously described blocking buffer at room temperature for 1 hr to overnight. Primary  
77 antibodies including mouse anti-Isl1 (Invitrogen), rabbit anti-Ebf1 (Millipore), mouse anti-Bcl11a (Abcam),  
78 goat anti-Sox2 (Invitrogen) were applied in the blocking solution overnight at 4 °C. Secondary antibodies  
79 (Life Technologies) were diluted in TBST for 2hr at room temperature or 4 °C overnight. 3 µM DAPI  
80 (Sigma-Aldrich) were used for nuclei labeling. For RNA *in situ* hybridization, we utilized RNAScope Assay  
81 per manufacturer instructions with following modifications (ACDBio). Pretreatment steps were performed  
82 using RNAScope H2O2 and Protease Reagents (ACDBio 322831). Inner ear sections were washed in 1x  
83 phosphate-buffered saline (PBS) for 5 min at room temperature to remove OCT. Slides were then baked  
84 for 30 min at 60 °C and post-fixed in pre-chilled 4% paraformaldehyde for 15 min at 4 °C. This was  
85 followed by dehydration in a series of ethanol (EtOH)/PBS (50%, 70%, and 100% EtOH) immersion for 5  
86 min at room temperature. Slides were then air dried for 5 min at room temperature and hydrophobic

87 barriers were created surrounding sections using ImmEdge hydrophobic barrier pen (Vector Laboratories  
88 H-4000). RNAScope Hydrogen Peroxide was then applied to each slide, incubated for 10 min at room  
89 temperature, and washed twice in distilled water at room temperature. Without performing the target  
90 retrieval step, RNAScope Protease III was applied to each slide and incubated for 4 min at 40 °C and  
91 then washed twice in distilled water at room temperature. RNAScope probes for *Sox4* (Mm-Sox4-C2;  
92 ACDBio 471381-C2) and *Sox11* (Mm-Sox11-O6; ACDBio 852081) were prewarmed to 40 °C for 10 min  
93 and then cooled to room temperature to ensure there was no precipitation in the solution. Immediately  
94 following pretreatment, enough probe mixture was applied to each slide to cover tissue sections. They  
95 were then incubated for 2 hours at 40 °C. Following probe hybridization, slides were washed in 1x  
96 RNAScope Wash Buffer (ACDBio 310091) twice for 3 min each at room temperature. Slides were then  
97 submerged in 5x saline sodium citrate (SSC) (diluted from 20x stock of 3M NaCl and 0.3M Sodium  
98 Citrate) overnight at room temperature for storage. Amplification and signal development steps were  
99 performed using RNAScope Multiplex Fluorescent Detection Kit (ACDBio 323110) and Opal fluorophore  
100 from Akoya Biosciences (Opal 570, PN FP1488001KT; Opal 690, PN FP1497001KT). Slides were  
101 removed from overnight 5x SSC and washed twice in 1x wash buffer for 3 min each at room temperature,  
102 followed by sequential incubation at 40 °C in RNAScope AMP1 (30 min), AMP2 (30 min), and AMP3  
103 (15min) reagents. After each incubation, slides were washed twice in 1x wash buffer for 3 min each at  
104 room temperature. After AMP3 incubation and washes, slides were then incubated at 40 °C with  
105 RNAScope C1-HRP for 15 min, Opal 570 fluorophore (1:1500 dilution in TSA buffer) for 30 min, and HRP  
106 blocker for 15 min to develop signal for *Sox11*. Following each incubation, slides were washed twice in 1x  
107 wash buffer for 3 min each at room temperature. This was then repeated with C2-HRP, Opal 690 (1:1500  
108 dilution in TSA buffer), and HRP blocker to develop signal for *Sox4*. Following the last wash, slides were  
109 then blocked and immunostained with goat-anti-*Sox2* (Invitrogen) and donkey-anti-goat (Abcam) primary  
110 and secondary antibodies as described above.

111

#### 112 **Molecular cloning of viral plasmids and virus production**

113 Adenovirus for *Sox4* and *Sox11* overexpression were described previously (4). Full-length coding  
114 sequences for *Sox4* and *Sox11* genes also cloned in frame with T2A-GFP to be expressed under the  
115 control of a cytomegalovirus promoter in the AAV vectors using Gibson assembly (NEB). The  
116 pAnc80L65AAP viral capsid ((5); Addgene plasmid 92307) was used to package adeno-associated virus  
117 in HEK293T cells. Virus was then purified by CsCl-gradient centrifugation followed by dialysis (Viral  
118 Vector Core Facility, Sanford Burnham Prebys Medical Discovery Institute). To achieve transduction of  
119 the inner ear sensory organs, each animal was injected at P5 into the lateral ventricle with 5 ul of the virus  
120 at a titer of  $10^{12}$  PFU/mL (6).

121

#### 122 **Single-cell RNA-sequencing and analysis**

123 Cochlear duct epithelia from E13.5 wildtype and *SoxC* conditional double knockout animals were  
124 collected as described above. Single-cell suspensions were obtained by trypsin treatment for 10min at 37  
125 °C. The standard protocol for the 10X single cell kit (V3.0) was followed and each sample was loaded  
126 onto a separate lane on the same chip. Samples were then sequenced using Illumina NextSeq kit.

127 Sequencing data from 10x runs was aligned and quantified using the CellRanger software using  
128 default parameters. Sequencing results for both reached 50% saturation. Quality controls and data  
129 analysis were done using Seurat (7, 8) and Scenic packages (9).

130

#### 131 **ATAC sequencing**

132 Cochlear duct epithelia from E13.5 wildtype and *SoxC* conditional double knockout animals were  
133 collected as described above. Whole epithelia were lysed in the buffer containing 10mM TrisHCl  
134 (pH=8.0), 5mM MgCl<sub>2</sub>, 10% DMF, 0.2% NP40 in ddH<sub>2</sub>O. Transposition buffer containing 10 mM Tris-HCl  
135 (pH=8.0), 5 mM MgCl<sub>2</sub>, 10% DMF, 0.2% NP40, and Tn5 transposase was then added and incubate at  
136 37°C for 20 min. After DNA purification, amplification and library construction was performed through  
137 PCR. At least 50 million paired-end reads were sequenced for each sample. Encode pipelines were  
138 adapted for analysis for ATAC-seq data.

139

#### 140 **CUT&RUN**

141 The CUT&RUN method for *in situ* chromatin immunoprecipitation was described previously (10)  
142 and was used to profile *Sox4* occupancy of the chromatin in E13.5 progenitors. Protein A-MNase fusion

143 protein was obtained from Dr. Henikoff's laboratory at Fred Hutchinson Cancer Research Center. Guinea  
144 pig anti-Sox4 antibody was used (3). CUT&RUN libraries were constructed using Accel-NGS 2S plus  
145 DNA prep kits with single index and MIDs (Swift Bioscience). At least 20 million paired-end reads were  
146 sequenced for each sample.

147 Encode pipelines were adapted for analysis of CUT&RUN data. Reads from the raw fastq files  
148 were aligned to GRCm38/mm10 genome assembly using STAR package (11). PCR duplicates were  
149 detected, and peaks were called by Model-based analysis of ChIP-Seq (MACS2) with FDR< 0.01 and the  
150 dynamic lambda (--nolambda) option for individual replicates. For each sample, IDR peaks, overlap  
151 peaks, and pooled peaks were identified between the biological replicates. BamCoverage files were  
152 generated directly from BAM files after sorting. Bigwig files were generated with deepTools (12). IGV (13)  
153 was used to visualize the genomic loci from Bigwig files. Heatmaps were generated with deepTools  
154 based on normalized Bigwig signal files. HOMER (14) suite was used for identifying transcription factor  
155 motif enrichment of subsets of the picked genomic regions. Closest genes and overlapping genes were  
156 identified using BEDOPS package with "closest-features" and "bedmap" functions respectively.  
157



158  
 159  
 160  
 161  
 162  
 163  
 164  
 165  
 166

**Figure S1.** Prosensory progenitors in the cochlear duct acquire competence to differentiate as hair cells and supporting cells between E12.0 and E13.5. Representative immunofluorescent images of the whole cochleae isolated from (A) E12.0, (B) E12.5, and (C) E13.5 *Atoh1-GFP* transgenic reporter mice and harvested for characterization after 3-day or 2-day in culture. *Atoh1-GFP*-positive hair cells (green) and *Sox2*-positive progenitor cells/supporting cells (red) are labeled. The nuclei are stained with DAPI (blue). Scale bar = 100  $\mu$ m.



167  
 168 **Figure S2.** The competent chromatin state established in the postmitotic progenitor cells is required for  
 169 Atoh1-mediated hair cell differentiation. (A) Immunofluorescence analysis of the dissociated cochlear  
 170 cells isolated from E12.0 animals and infected with *Ad-RFP* or *Ad-Atoh1-RFP* viral vectors demonstrates  
 171 the viral transduction efficiency. Widespread RFP expression (red) is observed in both conditions. Scale  
 172 bar = 50  $\mu$ m. (B) Bar graphs show the quantitative analysis of viral infection rate in A. (C) Representative  
 173 immunofluorescent images show the dissociated progenitor cells isolated at E12.0 and E13.5 cochlea  
 174 from the wildtype animals, infected with *Ad-RFP* control (left two columns) or *Ad-Atoh1-RFP* (right two  
 175 columns) virus, and maintained in culture for 3 days. Note that only in E13.5 cultures *Atoh1*  
 176 overexpression results in formation of the sensory rosettes with a small lumen formed by the actin-rich  
 177 (Phalloidin, white) apical surfaces of the polarized Pou4f3-positive hair cells (green) and surrounding  
 178 Sox2-positive supporting cells (blue). Scale bar = 50  $\mu$ m. (D) Bar graphs show the quantitative analysis of

179 cultures in C. Compared to other conditions, a significant increase of the percentage of Pou4f3-positive  
180 hair cells is observed in the E13.5 cultures where *Atoh1* is overexpressed (n=3).  
181

182  
183



184 **Figure S3.** SoxC transcription factors are essential for initiation of sensory differentiation during the  
185 development of organ of Corti. (A) Representative images show RNAscope *in situ* hybridization for Sox4

186 (red) and *Sox11* (white) in the utricles from WT embryos at E15.5. Sox2-positive supporting cells (green)  
187 are also immunolabeled. Scale bar = 50  $\mu\text{m}$ . (B) Representative images show RNAscope *in situ*  
188 hybridization for *Sox4* (red) and *Sox11* (white) in the developing organ of Corti (E12.0-E17.5). While  
189 *Sox11* is highly expressed in the cochlear duct and the spiral ganglion with the signal strongest at E12.0  
190 and decreasing by E17.5. *Sox4* expression is increased from E12.0 to E13.5 and is strongest in the  
191 developing hair cells and spiral ganglion neurons at E17.5. Sox2-positive supporting cells (green) are also  
192 immunolabeled. Scale bar = 50  $\mu\text{m}$ . (C) Representative immunofluorescent images show the whole  
193 cochlea isolated from the WT and *SoxC* KO littermate embryos at E14.5. Sox2-positive supporting cells  
194 (red) and one row of Pou4f3-positive inner hair cells (green) are detected in the WT but not in the *SoxC*  
195 KO organs. Note that no apoptotic cells are detected by activated caspase 3 staining (white) in either  
196 condition. Cell nuclei are labeled with DAPI (blue). Scale bar = 50  $\mu\text{m}$ .  
197



198  
 199  
 200  
 201  
 202  
 203  
 204  
 205  
 206  
 207  
 208  
 209  
 210  
 211  
 212  
 213

**Figure S4.** Single cell RNA-seq indicates that SoxC transcription factors promote hair cell differentiation by regulating key sensory lineage genes. (A) Dot plot demonstrates the gene expression profiles of selected cluster-specific markers in previously known cell types identified in the WT or SoxC KO cochlea. The organ of Corti progenitor cell population (Prog) expresses high levels of Cdkn1b, Sox2, Hey2 and Ebf1; The Kölliker's organ cells are also positive for Sox2 and Ebf1, but are negative for Cdkn1b and Hey2; Otx2 is a specific marker for the roof domain of the cochlea duct (Roof); Bmp4 expression is detected specifically in the outer sulcus domain (outer sulcus). Mki67 and Top2a expression indicates the proliferating populations of the Kölliker's organ and the organ of Corti (Prolif\_prog), outer sulcus (Prolif\_outer sulcus) and roof domains (Prolif\_roof). A full list of top markers for each cell cluster can be found in Dataset S1. (B) UMAP feature plots demonstrate transcript levels for cell markers specific to the known cochlear cell types. The outer sulcus is identified based on the Bmp4 expression. The active proliferating cells in the cochlea duct are identified by high level of Top2a expression. (C) UMAP visualization of WT (orange) and SoxC KO (green) organ of Corti progenitor cell population at E13.5. (D) UMAP feature plots

214 demonstrate that essential sensory lineage genes such as Sox11, Bcl11a, and Eya1 are significantly  
215 downregulated in SoxC KO progenitor cells compared to control. A full list of differentially expressed  
216 genes can be found in Dataset S2. (E) UMAP feature plots demonstrate that several genes such as Egr1,  
217 Fos, Btg2 and Krt18 are significantly upregulated in SoxC KO progenitor cells compared to control.  
218



219  
220  
221  
222  
223  
224  
225  
226  
227  
228  
229  
230  
231

**Figure S5.** SoxC transcription factors control chromatin accessibility to promote hair cell differentiation in the E13.5 organ of Corti. (A) A Heatmap on the left shows all accessible genomic regions identified by ATAC-seq in the WT and SoxC KO cochlea at E13.5. In the middle heatmap, regulatory elements that lose (42,725; SoxC-dependent regions, WT unique) or gain (79,973; SoxC-dependent regions, KO unique) accessibility in the SoxC KO cochlea (SoxC-dependent regions) are filtered by their accessibility in both E12.0 and E13.5 purified progenitors (Prog). Out of 4,374 peaks in Cluster I, 2,659 peaks are E13.5-specific. Out of 6,246 peaks in Cluster II, 4,395 were E12.0-specific. (B) Gene ontology (GO) terms identified using GREAT show the top 10 biological processes most-enriched in the genes associated with Cluster I and Cluster II – SoxC-dependent regions that lose and gain accessibility, respectively. (C) HOMER analysis shows top five most enriched DNA-binding motifs in SoxC-dependent peaks lost their accessibility (Cluster I) and gained accessibility (Cluster II), respectively.

232  
233  
234



235 **Figure S6.** SoxC transcription factors trigger new hair cell generation in the non-competent organ of Corti  
236 progenitor cells *in vitro*. (A) Representative low magnification immunofluorescent images demonstrate  
237 that overexpression of Sox2 in the dissociated cochlea progenitor cells isolated from *Atoh1-GFP* reporter  
238 mice fails to induce sensory differentiation. In contrast, overexpression of either Sox4 or Sox11 promotes  
239 hair cell differentiation under the same conditions. Atoh1-GFP-positive hair cells (green) in the *Sox4* and  
240 *Sox11* overexpressing cochlea cultures and are organized into the sensory rosettes. Actin is labeled in  
241 white (phalloidin). Scale bar = 100  $\mu$ m. (B) Bar graph shows quantitative analysis of the cultures in A. The  
242 percentages of Atoh1-GFP-positive hair cell are low in RFP control and Sox2 overexpression conditions  
243 compared to the SoxC overexpression groups (n=3 for each condition).  
244



245  
 246  
 247  
 248  
 249  
 250  
 251  
 252  
 253  
 254  
 255  
 256  
 257  
 258

**Figure S7.** SoxC transcription factors trigger new hair cell generation in the postnatal organ of Corti supporting cells in vitro and in vivo. (A) Representative immunofluorescent images show that FACS purified P6 Lfng-GFP-positive cochlea supporting cells (green) were transdifferentiated into MyoVIIa-positive hair cells (red) after 7 days in culture upon *Sox4* or *Sox11* overexpression (Scale bars = 50  $\mu$ m). (B) Bar graphs show quantitative analysis of cultures in A. A significant increase in percentage of MyoVIIa-positive hair cells is observed in *Sox4* or *Sox11* overexpression conditions compared to the *RFP*-control (n=3 for each condition). (C) Representative immunofluorescent images show the P15 whole-mount cochlea from *Sox4* overexpression conditions. Lfng-positive supporting cells are labeled in grey, infected cells are labeled in green, hair cells are stained with MyoVIIa in red. White arrows indicate transdifferentiated triple labeled cells. Scale bar = 20  $\mu$ m.

259 **Datasets S1.** Top20 expressed genes in each cluster identified in WT and SoxC cKO cochlea.  
260  
261 **Dataset S2.** Genes differentially expressed between WT and SoxC KO postmitotic progenitor cells at  
262 E13.5 (cutoff: logFC > 0.6).  
263  
264 **Dataset S3.** Sox4-occupied genomic loci that gain accessibility between E12.0 and E13.5 and lose  
265 accessibility in SoxC cKO.  
266  
267

268  
269  
270  
271  
272  
273  
274  
275  
276  
277  
278  
279  
280  
281  
282  
283  
284  
285  
286  
287  
288  
289  
290  
291  
292  
293  
294  
295  
296  
297

## Reference

1. K. Gnedeva, A. J. Hudspeth, N. Segil, Three-dimensional Organotypic Cultures of Vestibular and Auditory Sensory Organs. *J. Vis. Exp.* (2018) <https://doi.org/10.3791/57527>.
2. A. Doetzlhofer, P. M. White, J. E. Johnson, N. Segil, A. K. Groves, In vitro growth and differentiation of mammalian sensory hair cell progenitors: a requirement for EGF and periotic mesenchyme. *Dev. Biol.* **272**, 432–47 (2004).
3. D. C. Thein, *et al.*, The closely related transcription factors Sox4 and Sox11 function as survival factors during spinal cord development. *J. Neurochem.* **115**, 131–41 (2010).
4. K. Gnedeva, A. J. Hudspeth, SoxC transcription factors are essential for the development of the inner ear. *Proc. Natl. Acad. Sci.* **112**, 14066–14071 (2015).
5. L. D. Landegger, *et al.*, A synthetic AAV vector enables safe and efficient gene transfer to the mammalian inner ear. *Nat. Biotechnol.* **35**, 280–284 (2017).
6. K. Gnedeva, *et al.*, Organ of Corti size is governed by Yap/Tead-mediated progenitor self-renewal. *Proc. Natl. Acad. Sci.* **117**, 13552–13561 (2020).
7. A. Butler, P. Hoffman, P. Smibert, E. Papalexi, R. Satija, Integrating single-cell transcriptomic data across different conditions, technologies, and species. *Nat. Biotechnol.* **36**, 411–420 (2018).
8. T. Stuart, *et al.*, Comprehensive Integration of Single-Cell Data. *Cell* **177**, 1888-1902.e21 (2019).
9. S. Aibar, *et al.*, SCENIC: single-cell regulatory network inference and clustering. *Nat. Methods* **14**, 1083–1086 (2017).
10. P. J. Skene, S. Henikoff, An efficient targeted nuclease strategy for high-resolution mapping of DNA binding sites. *Elife* **6** (2017).
11. A. Dobin, *et al.*, STAR: ultrafast universal RNA-seq aligner. *Bioinformatics* **29**, 15–21 (2013).
12. F. Ramírez, *et al.*, deepTools2: a next generation web server for deep-sequencing data analysis. *Nucleic Acids Res.* **44**, W160–W165 (2016).
13. J. T. Robinson, *et al.*, Integrative genomics viewer. *Nat. Biotechnol.* **29**, 24–26 (2011).
14. S. Heinz, *et al.*, Simple combinations of lineage-determining transcription factors prime cis-regulatory elements required for macrophage and B cell identities. *Mol. Cell* **38**, 576–89 (2010).
