# Supplementary material for: SoxC transcription factors shape the epigenetic landscape to establish competence for sensory differentiation in the mammalian organ of Corti
Source: PubMed Central journal article supplement — Proc Natl Acad Sci U S A. 2023 Aug 16;120(34):e2301301120. doi: 10.1073/pnas.2301301120 (PMC10450657; doi:10.1073/pnas.2301301120), 2023-08-16
Supplement: pnas.2301301120.sd01.pdf [file pnas.2301301120.sd01.pdf]

**Dataset S1. Top20 expressed genes in each cluster identified in WT and SoxC cKO cochlea.**

| p_val     | avg_log2FC | pct.1 | pct.2 | p_val_adj | cluster | gene          |
|-----------|------------|-------|-------|-----------|---------|---------------|
| 2.86E-219 | 1.19214952 | 0.784 | 0.603 | 5.71E-216 | 0       | Cryab         |
| 2.60E-246 | 1.06935623 | 0.919 | 0.648 | 5.21E-243 | 0       | Ebf1          |
| 3.19E-279 | 0.9683778  | 0.82  | 0.437 | 6.38E-276 | 0       | Tmod1         |
| 5.86E-237 | 0.92126711 | 0.892 | 0.667 | 1.17E-233 | 0       | Tecta         |
| 9.47E-211 | 0.85197961 | 0.671 | 0.371 | 1.89E-207 | 0       | Aldh1a3       |
| 1.51E-114 | 0.79127426 | 0.792 | 0.63  | 3.02E-111 | 0       | Mia           |
| 1.08E-154 | 0.77899052 | 0.751 | 0.53  | 2.16E-151 | 0       | Rgcc          |
| 5.76E-189 | 0.72635592 | 0.958 | 0.861 | 1.15E-185 | 0       | Epha7         |
| 4.77E-142 | 0.71522203 | 0.981 | 0.881 | 9.53E-139 | 0       | Tgfb2         |
| 1.88E-175 | 0.70012671 | 0.99  | 0.959 | 3.77E-172 | 0       | Atp2b1        |
| 7.03E-114 | 0.67607187 | 0.732 | 0.523 | 1.41E-110 | 0       | Ckb           |
| 1.13E-183 | 0.62104483 | 0.878 | 0.793 | 2.27E-180 | 0       | Crip2         |
| 1.65E-152 | 0.61675453 | 0.933 | 0.802 | 3.31E-149 | 0       | Irx3          |
| 4.62E-146 | 0.60483016 | 0.984 | 0.884 | 9.23E-143 | 0       | Nr2f1         |
| 1.77E-130 | 0.60138726 | 0.991 | 0.941 | 3.54E-127 | 0       | Ccnd1         |
| 1.19E-87  | 0.59257533 | 0.679 | 0.554 | 2.38E-84  | 0       | Slc12a2       |
| 2.58E-134 | 0.54009938 | 0.81  | 0.659 | 5.17E-131 | 0       | Chst15        |
| 1.97E-163 | 0.53670196 | 0.593 | 0.393 | 3.93E-160 | 0       | 1500015O10Rik |
| 1.04E-142 | 0.53444439 | 0.826 | 0.661 | 2.07E-139 | 0       | Pantr1        |
| 4.94E-129 | 0.52406754 | 0.682 | 0.502 | 9.87E-126 | 0       | Fbxo32        |
| 0         | 1.52234885 | 0.91  | 0.491 | 0         | 1       | Bmp4          |
| 0         | 1.34486139 | 0.99  | 0.944 | 0         | 1       | Clu           |
| 0         | 1.26134373 | 0.991 | 0.833 | 0         | 1       | Gata3         |
| 0         | 1.03249347 | 1     | 0.983 | 0         | 1       | Btg1          |
| 3.38E-187 | 0.9579012  | 0.823 | 0.621 | 6.77E-184 | 1       | Lum           |
| 2.72E-286 | 0.9262467  | 0.97  | 0.806 | 5.45E-283 | 1       | Fbxo2         |
| 1.32E-159 | 0.91435327 | 0.945 | 0.871 | 2.64E-156 | 1       | H19           |
| 0         | 0.90894032 | 0.991 | 0.954 | 0         | 1       | Grb10         |
| 5.91E-279 | 0.7712551  | 0.988 | 0.945 | 1.18E-275 | 1       | Sfrp1         |
| 1.07E-154 | 0.74857659 | 0.751 | 0.559 | 2.13E-151 | 1       | Fst           |
| 8.78E-201 | 0.73352177 | 0.661 | 0.421 | 1.76E-197 | 1       | Hs3st1        |
| 3.69E-159 | 0.72149772 | 0.739 | 0.635 | 7.38E-156 | 1       | 9230102O04Rik |
| 4.37E-187 | 0.72038108 | 0.76  | 0.486 | 8.74E-184 | 1       | Fam132a       |
| 4.92E-165 | 0.70691203 | 0.683 | 0.461 | 9.84E-162 | 1       | Gata2         |
| 5.54E-181 | 0.69831361 | 0.852 | 0.781 | 1.11E-177 | 1       | Rtn1          |
| 7.02E-176 | 0.69353358 | 0.766 | 0.589 | 1.40E-172 | 1       | Unc5b         |
| 4.63E-249 | 0.69313734 | 0.996 | 0.929 | 9.26E-246 | 1       | Id3           |

|           |            |       |       |           |   |               |
|-----------|------------|-------|-------|-----------|---|---------------|
| 7.58E-106 | 0.64453873 | 0.757 | 0.675 | 1.52E-102 | 1 | Gjb2          |
| 9.02E-189 | 0.64017745 | 0.949 | 0.909 | 1.80E-185 | 1 | Uchl1         |
| 6.16E-133 | 0.63574357 | 0.963 | 0.911 | 1.23E-129 | 1 | Hmga2         |
| 0         | 1.56481078 | 0.978 | 0.776 | 0         | 2 | Isl1          |
| 0         | 1.48922726 | 0.987 | 0.908 | 0         | 2 | Hmga2         |
| 0         | 1.4550046  | 0.904 | 0.475 | 0         | 2 | Sox2          |
| 2.56E-194 | 1.34046948 | 0.728 | 0.593 | 5.11E-191 | 2 | Tectb         |
| 0         | 1.32010725 | 0.923 | 0.54  | 0         | 2 | Zdhhc2        |
| 0         | 1.27873849 | 0.933 | 0.717 | 0         | 2 | Rorb          |
| 0         | 1.17251852 | 1     | 0.882 | 0         | 2 | Nr2f1         |
| 0         | 1.16735996 | 0.874 | 0.53  | 0         | 2 | Moxd1         |
| 0         | 1.15699955 | 0.84  | 0.543 | 0         | 2 | Ntf3          |
| 0         | 1.12231944 | 0.949 | 0.817 | 0         | 2 | Socs2         |
| 0         | 1.12079074 | 0.897 | 0.747 | 0         | 2 | Slc1a3        |
| 8.16E-239 | 1.05705535 | 0.907 | 0.652 | 1.63E-235 | 2 | Ebf1          |
| 0         | 1.0422603  | 0.931 | 0.86  | 0         | 2 | Cdkn1b        |
| 0         | 1.04033445 | 0.987 | 0.932 | 0         | 2 | Zfos1         |
| 0         | 0.99071575 | 0.912 | 0.666 | 0         | 2 | Tecta         |
| 6.24E-255 | 0.98340846 | 0.767 | 0.471 | 1.25E-251 | 2 | S100a1        |
| 1.07E-265 | 0.95737873 | 0.735 | 0.474 | 2.14E-262 | 2 | Nrxn3         |
| 2.10E-264 | 0.95271048 | 0.989 | 0.944 | 4.20E-261 | 2 | Clu           |
| 1.19E-281 | 0.94727498 | 0.872 | 0.64  | 2.38E-278 | 2 | Anxa5         |
| 0         | 0.93008344 | 0.946 | 0.786 | 0         | 2 | Eya1          |
| 0         | 2.00591389 | 0.828 | 0.585 | 0         | 3 | Tectb         |
| 0         | 1.6740812  | 0.999 | 0.647 | 0         | 3 | Ebf1          |
| 0         | 1.64076142 | 0.887 | 0.583 | 0         | 3 | Hist1h2ap     |
| 0         | 1.61716247 | 0.951 | 0.549 | 0         | 3 | Top2a         |
| 0         | 1.59857807 | 0.984 | 0.663 | 0         | 3 | Tecta         |
| 0         | 1.44264066 | 0.969 | 0.594 | 0         | 3 | 2810417H13Rik |
| 8.02E-292 | 1.39984928 | 0.879 | 0.565 | 1.60E-288 | 3 | Cenpf         |
| 0         | 1.39933117 | 1     | 0.91  | 0         | 3 | Hmgb2         |
| 5.13E-301 | 1.27725257 | 0.859 | 0.555 | 1.03E-297 | 3 | Nusap1        |
| 0         | 1.27014086 | 0.941 | 0.645 | 0         | 3 | H2afx         |
| 0         | 1.21554159 | 0.992 | 0.843 | 0         | 3 | Ybx3          |
| 3.14E-191 | 1.11927498 | 0.77  | 0.514 | 6.28E-188 | 3 | Ube2c         |
| 1.20E-279 | 1.11650759 | 0.787 | 0.442 | 2.41E-276 | 3 | Prc1          |
| 0         | 1.09136078 | 0.911 | 0.437 | 0         | 3 | Tmod1         |
| 0         | 1.04546767 | 0.93  | 0.564 | 0         | 3 | Smc4          |
| 0         | 1.00965841 | 1     | 0.941 | 0         | 3 | Ccnd1         |
| 0         | 0.99243325 | 1     | 0.885 | 0         | 3 | Nr2f1         |

|           |            |       |       |           |   |               |
|-----------|------------|-------|-------|-----------|---|---------------|
| 1.05E-134 | 0.99133683 | 0.754 | 0.611 | 2.10E-131 | 3 | Cryab         |
| 0         | 0.98204806 | 1     | 0.921 | 0         | 3 | Dek           |
| 1.06E-206 | 0.97683723 | 0.854 | 0.615 | 2.12E-203 | 3 | Cks2          |
| 0         | 1.61054755 | 0.968 | 0.549 | 0         | 4 | Top2a         |
| 0         | 1.55212215 | 0.909 | 0.563 | 0         | 4 | Cenpf         |
| 0         | 1.40768709 | 0.912 | 0.582 | 0         | 4 | Hist1h2ap     |
| 0         | 1.3722923  | 1     | 0.91  | 0         | 4 | Hmgb2         |
| 4.39E-192 | 1.30985687 | 0.78  | 0.514 | 8.79E-189 | 4 | Ube2c         |
| 3.53E-301 | 1.24736148 | 0.878 | 0.555 | 7.06E-298 | 4 | Nusap1        |
| 2.42E-205 | 1.18025445 | 0.929 | 0.766 | 4.83E-202 | 4 | Lockd         |
| 0         | 1.09406995 | 0.966 | 0.597 | 0         | 4 | 2810417H13Rik |
| 7.76E-287 | 1.07867557 | 0.931 | 0.723 | 1.55E-283 | 4 | Sall3         |
| 0         | 1.03254203 | 0.938 | 0.565 | 0         | 4 | Smc4          |
| 1.52E-253 | 0.99261275 | 0.932 | 0.648 | 3.05E-250 | 4 | H2afx         |
| 9.14E-216 | 0.99077223 | 0.875 | 0.615 | 1.83E-212 | 4 | Cks2          |
| 6.74E-258 | 0.95525734 | 0.838 | 0.501 | 1.35E-254 | 4 | Mki67         |
| 0         | 0.95292164 | 0.981 | 0.735 | 0         | 4 | Smc2          |
| 7.87E-225 | 0.92016084 | 0.781 | 0.444 | 1.57E-221 | 4 | Prc1          |
| 9.79E-303 | 0.91793129 | 0.858 | 0.504 | 1.96E-299 | 4 | Spc25         |
| 1.40E-263 | 0.91121659 | 0.882 | 0.491 | 2.80E-260 | 4 | Birc5         |
| 0         | 0.89596723 | 1     | 0.996 | 0         | 4 | H2afz         |
| 1.34E-281 | 0.89021676 | 0.997 | 0.922 | 2.68E-278 | 4 | Dek           |
| 2.69E-293 | 0.88116691 | 0.997 | 0.868 | 5.38E-290 | 4 | Cks1b         |
| 0         | 2.25477703 | 1     | 0.897 | 0         | 5 | Oc90          |
| 0         | 1.68538154 | 0.935 | 0.439 | 0         | 5 | Ecel1         |
| 0         | 1.44800964 | 0.924 | 0.417 | 0         | 5 | Frem2         |
| 5.09E-215 | 1.3451538  | 0.983 | 0.769 | 1.02E-211 | 5 | Igfbp5        |
| 0         | 1.26986468 | 0.945 | 0.53  | 0         | 5 | Pax2          |
| 2.31E-288 | 1.26704774 | 0.934 | 0.502 | 4.62E-285 | 5 | Ccnd2         |
| 0         | 1.12831124 | 0.885 | 0.427 | 0         | 5 | Fut9          |
| 3.20E-223 | 1.04324527 | 0.921 | 0.549 | 6.41E-220 | 5 | Meg3          |
| 0         | 1.03683773 | 0.858 | 0.361 | 0         | 5 | Gsc           |
| 1.70E-302 | 1.03140127 | 0.996 | 0.912 | 3.39E-299 | 5 | Lect1         |
| 3.81E-269 | 1.01290957 | 0.933 | 0.64  | 7.62E-266 | 5 | Arl4c         |
| 0         | 1.0052768  | 0.867 | 0.349 | 0         | 5 | Kctd8         |
| 0         | 0.96368303 | 0.99  | 0.907 | 0         | 5 | Mtch1         |
| 1.62E-216 | 0.95789946 | 0.951 | 0.735 | 3.25E-213 | 5 | Dclk1         |
| 3.92E-179 | 0.9485629  | 0.985 | 0.87  | 7.83E-176 | 5 | H19           |
| 1.17E-258 | 0.93955729 | 0.943 | 0.636 | 2.35E-255 | 5 | Ppp2r2b       |
| 2.57E-219 | 0.87633425 | 0.992 | 0.948 | 5.14E-216 | 5 | Nrep          |

|           |            |       |       |           |   |               |
|-----------|------------|-------|-------|-----------|---|---------------|
| 1.65E-172 | 0.86707944 | 0.924 | 0.659 | 3.31E-169 | 5 | Sptssa        |
| 0         | 0.83670016 | 0.821 | 0.457 | 0         | 5 | Cxxc4         |
| 2.44E-264 | 0.83120847 | 0.793 | 0.347 | 4.89E-261 | 5 | Lurap1l       |
| 0         | 2.65412511 | 0.992 | 0.545 | 0         | 6 | Meg3          |
| 0         | 2.27794778 | 1     | 0.897 | 0         | 6 | Oc90          |
| 0         | 2.18813219 | 0.984 | 0.529 | 0         | 6 | Pid1          |
| 0         | 2.03744698 | 0.978 | 0.555 | 0         | 6 | Otx2          |
| 0         | 1.98851234 | 0.916 | 0.491 | 0         | 6 | Ap1s2         |
| 0         | 1.95024019 | 0.933 | 0.424 | 0         | 6 | Wnt4          |
| 0         | 1.78125495 | 0.999 | 0.887 | 0         | 6 | Ptn           |
| 0         | 1.60442897 | 0.872 | 0.543 | 0         | 6 | Smoc2         |
| 0         | 1.58483806 | 0.981 | 0.734 | 0         | 6 | Sulf1         |
| 0         | 1.56935905 | 0.861 | 0.353 | 0         | 6 | Slc6a15       |
| 0         | 1.53801808 | 0.958 | 0.674 | 0         | 6 | Calml4        |
| 0         | 1.5016371  | 0.875 | 0.471 | 0         | 6 | B4galt6       |
| 0         | 1.44285422 | 0.848 | 0.371 | 0         | 6 | Tpm2          |
| 0         | 1.40631672 | 0.913 | 0.535 | 0         | 6 | Phldb2        |
| 0         | 1.37530473 | 0.889 | 0.454 | 0         | 6 | Lypd6         |
| 0         | 1.36468064 | 0.906 | 0.632 | 0         | 6 | Fgf9          |
| 0         | 1.35682544 | 0.971 | 0.616 | 0         | 6 | Tshz2         |
| 0         | 1.32756847 | 0.866 | 0.403 | 0         | 6 | Postn         |
| 0         | 1.25278626 | 0.831 | 0.44  | 0         | 6 | Mecom         |
| 0         | 1.23831733 | 0.931 | 0.698 | 0         | 6 | Pcdh7         |
| 4.18E-288 | 1.81734003 | 1     | 0.899 | 8.36E-285 | 7 | Oc90          |
| 4.91E-238 | 1.46594163 | 0.952 | 0.565 | 9.83E-235 | 7 | Top2a         |
| 4.20E-206 | 1.35986748 | 0.916 | 0.575 | 8.41E-203 | 7 | Cenpf         |
| 6.82E-198 | 1.33202232 | 0.882 | 0.566 | 1.36E-194 | 7 | Nusap1        |
| 6.23E-306 | 1.27637191 | 0.972 | 0.564 | 1.25E-302 | 7 | Otx2          |
| 3.19E-229 | 1.23637031 | 0.999 | 0.914 | 6.37E-226 | 7 | Hmgb2         |
| 1.04E-229 | 1.20353341 | 0.979 | 0.609 | 2.07E-226 | 7 | 2810417H13Rik |
| 4.98E-192 | 1.20059335 | 0.935 | 0.62  | 9.96E-189 | 7 | Cks2          |
| 1.37E-139 | 1.1335537  | 0.938 | 0.771 | 2.74E-136 | 7 | Lockd         |
| 6.44E-154 | 1.1308681  | 0.835 | 0.52  | 1.29E-150 | 7 | Ube2c         |
| 1.71E-220 | 1.12098828 | 0.926 | 0.502 | 3.43E-217 | 7 | Birc5         |
| 7.57E-202 | 1.0056046  | 0.961 | 0.745 | 1.51E-198 | 7 | Smc2          |
| 1.66E-190 | 0.97062586 | 0.879 | 0.51  | 3.33E-187 | 7 | Mki67         |
| 2.45E-213 | 0.94646256 | 0.945 | 0.619 | 4.91E-210 | 7 | Cndp2         |
| 2.75E-215 | 0.92164958 | 0.847 | 0.457 | 5.49E-212 | 7 | Ecel1         |
| 8.45E-146 | 0.9187502  | 0.876 | 0.596 | 1.69E-142 | 7 | Hist1h2ap     |
| 8.20E-197 | 0.8971942  | 1     | 0.914 | 1.64E-193 | 7 | Lect1         |

|           |            |       |       |           |   |         |
|-----------|------------|-------|-------|-----------|---|---------|
| 4.65E-178 | 0.89533331 | 0.862 | 0.534 | 9.31E-175 | 7 | Tpx2    |
| 5.92E-151 | 0.89396724 | 0.791 | 0.455 | 1.18E-147 | 7 | Prc1    |
| 1.95E-113 | 0.87149153 | 0.978 | 0.87  | 3.90E-110 | 7 | Arl6ip1 |
| 0         | 2.98070189 | 0.965 | 0.496 | 0         | 8 | Tac1    |
| 0         | 2.31976537 | 0.995 | 0.556 | 0         | 8 | Fst     |
| 0         | 2.22741801 | 1     | 0.946 | 0         | 8 | Clu     |
| 0         | 2.13417078 | 0.995 | 0.623 | 0         | 8 | Nr2f2   |
| 0         | 1.97094138 | 0.984 | 0.633 | 0         | 8 | Pcdh17  |
| 0         | 1.96456214 | 0.999 | 0.774 | 0         | 8 | Igfbp5  |
| 0         | 1.86191184 | 1     | 0.912 | 0         | 8 | Hmga2   |
| 0         | 1.78861561 | 0.99  | 0.795 | 0         | 8 | Vim     |
| 4.16E-293 | 1.61746399 | 0.98  | 0.726 | 8.32E-290 | 8 | Rorb    |
| 0         | 1.56133268 | 0.999 | 0.843 | 0         | 8 | Gata3   |
| 2.16E-288 | 1.4111665  | 0.989 | 0.787 | 4.31E-285 | 8 | Isl1    |
| 3.21E-274 | 1.32351182 | 0.957 | 0.667 | 6.42E-271 | 8 | Ppfibp1 |
| 6.13E-289 | 1.27771223 | 0.987 | 0.816 | 1.23E-285 | 8 | Fbxo2   |
| 0         | 1.26653473 | 0.999 | 0.984 | 0         | 8 | Btg1    |
| 2.37E-284 | 1.25922604 | 0.877 | 0.381 | 4.75E-281 | 8 | Rprm    |
| 9.60E-221 | 1.21287519 | 0.918 | 0.687 | 1.92E-217 | 8 | Fn1     |
| 7.14E-195 | 1.14920251 | 0.814 | 0.532 | 1.43E-191 | 8 | Ntng1   |
| 4.73E-231 | 1.11369039 | 0.772 | 0.371 | 9.46E-228 | 8 | Msx1    |
| 4.58E-238 | 1.07856668 | 0.814 | 0.41  | 9.16E-235 | 8 | Angpt1  |
| 6.08E-219 | 1.06681339 | 0.869 | 0.596 | 1.22E-215 | 8 | Plet1   |
| 0         | 2.01562537 | 0.809 | 0.04  | 0         | 9 | Col3a1  |
| 0         | 2.00384689 | 0.907 | 0.108 | 0         | 9 | Col1a1  |
| 0         | 1.98506405 | 0.95  | 0.264 | 0         | 9 | Col26a1 |
| 0         | 1.92133    | 0.976 | 0.621 | 0         | 9 | Igfbp4  |
| 3.21E-216 | 1.8595192  | 0.764 | 0.135 | 6.41E-213 | 9 | Col1a2  |
| 1.08E-243 | 1.83750173 | 0.797 | 0.232 | 2.15E-240 | 9 | Cped1   |
| 5.15E-231 | 1.81810641 | 0.717 | 0.022 | 1.03E-227 | 9 | Tbx18   |
| 0         | 1.6653236  | 0.916 | 0.103 | 0         | 9 | Bgn     |
| 4.82E-257 | 1.59184507 | 0.968 | 0.696 | 9.65E-254 | 9 | Lgals1  |
| 2.79E-205 | 1.58046516 | 0.948 | 0.506 | 5.58E-202 | 9 | Car2    |
| 5.75E-120 | 1.56142875 | 0.966 | 0.669 | 1.15E-116 | 9 | Crym    |
| 6.22E-253 | 1.52593    | 0.718 | 0.007 | 1.24E-249 | 9 | Prrx1   |
| 8.33E-123 | 1.5130137  | 0.745 | 0.412 | 1.67E-119 | 9 | Vcan    |
| 2.87E-305 | 1.38014674 | 0.92  | 0.26  | 5.74E-302 | 9 | Timp3   |
| 7.18E-202 | 1.36612858 | 0.889 | 0.64  | 1.44E-198 | 9 | Cald1   |
| 1.48E-198 | 1.35302702 | 0.975 | 0.663 | 2.96E-195 | 9 | Ebf1    |
| 5.61E-227 | 1.33527517 | 0.961 | 0.513 | 1.12E-223 | 9 | Ccnd2   |

|           |            |       |       |           |    |               |
|-----------|------------|-------|-------|-----------|----|---------------|
| 3.81E-191 | 1.32814212 | 0.976 | 0.691 | 7.62E-188 | 9  | Csrp2         |
| 3.50E-144 | 1.29938578 | 0.986 | 0.609 | 7.01E-141 | 9  | 2810417H13Rik |
| 1.66E-72  | 1.29743309 | 0.62  | 0.071 | 3.32E-69  | 9  | Tgfb1         |
| 5.93E-117 | 1.78784307 | 0.993 | 0.78  | 1.19E-113 | 10 | Igfbp5        |
| 1.27E-66  | 1.59176139 | 0.739 | 0.49  | 2.54E-63  | 10 | Lor           |
| 2.23E-196 | 1.5817251  | 0.854 | 0.29  | 4.46E-193 | 10 | Cpm           |
| 3.85E-183 | 1.47202751 | 0.934 | 0.419 | 7.70E-180 | 10 | Npnt          |
| 3.82E-173 | 1.45471505 | 0.946 | 0.444 | 7.63E-170 | 10 | Frem2         |
| 1.45E-55  | 1.34246987 | 0.893 | 0.646 | 2.90E-52  | 10 | Pcdh17        |
| 3.07E-63  | 1.12603266 | 0.807 | 0.493 | 6.14E-60  | 10 | Dcn           |
| 2.49E-121 | 1.11429013 | 0.98  | 0.731 | 4.98E-118 | 10 | Krt18         |
| 1.15E-101 | 1.06663715 | 0.983 | 0.876 | 2.30E-98  | 10 | Rbp1          |
| 5.01E-122 | 1.05505015 | 0.946 | 0.628 | 1.00E-118 | 10 | Dapk1         |
| 1.34E-117 | 1.05101195 | 0.985 | 0.773 | 2.67E-114 | 10 | Krt8          |
| 1.95E-105 | 1.02928882 | 0.961 | 0.804 | 3.89E-102 | 10 | Gpc6          |
| 1.22E-124 | 0.9716663  | 0.954 | 0.577 | 2.44E-121 | 10 | Otx2          |
| 2.00E-90  | 0.96912195 | 0.917 | 0.584 | 4.01E-87  | 10 | Fam101b       |
| 5.62E-92  | 0.91683622 | 0.849 | 0.477 | 1.12E-88  | 10 | Lypd6         |
| 1.74E-115 | 0.90584695 | 0.822 | 0.303 | 3.49E-112 | 10 | Negr1         |
| 3.09E-107 | 0.89815024 | 0.822 | 0.32  | 6.18E-104 | 10 | Cthrc1        |
| 6.22E-96  | 0.8828067  | 0.944 | 0.645 | 1.24E-92  | 10 | Fgf9          |
| 1.19E-128 | 0.84624233 | 0.815 | 0.288 | 2.39E-125 | 10 | Gprin3        |
| 4.41E-59  | 0.76841997 | 0.978 | 0.903 | 8.83E-56  | 10 | Oc90          |
