# Supplementary material for: SoxC transcription factors shape the epigenetic landscape to establish competence for sensory differentiation in the mammalian organ of Corti
Source: PubMed Central journal article supplement — Proc Natl Acad Sci U S A. 2023 Aug 16;120(34):e2301301120. doi: 10.1073/pnas.2301301120 (PMC10450657; doi:10.1073/pnas.2301301120), 2023-08-16
Supplement: pnas.2301301120.sd02.pdf [file pnas.2301301120.sd02.pdf]

**Dataset S2. Genes differentially expressed between WT and SoxC KO postmitotic progenitor cells at E13.5 (cutoff: logFC > 0.6).**

| Gene          | p_val     | avg_logFC  | pct.1 | pct.2 | p_val_adj |
|---------------|-----------|------------|-------|-------|-----------|
| Sox11         | 5.56E-195 | 2.49999096 | 0.987 | 0.317 | 9.44E-191 |
| Ebf1          | 5.37E-101 | 1.82519839 | 0.732 | 0.13  | 9.12E-97  |
| Tectb         | 3.03E-58  | 1.79657983 | 0.449 | 0.024 | 5.15E-54  |
| Sall3         | 3.50E-102 | 1.49075411 | 0.645 | 0.007 | 5.94E-98  |
| Tuba1a        | 4.74E-86  | 1.25489644 | 0.715 | 0.225 | 8.04E-82  |
| Tecta         | 5.21E-71  | 1.17377479 | 0.604 | 0.119 | 8.85E-67  |
| Pdap1         | 6.09E-128 | 1.10120836 | 0.941 | 0.811 | 1.03E-123 |
| Crym          | 2.34E-63  | 1.06345886 | 0.52  | 0.066 | 3.97E-59  |
| Tmsb10        | 3.59E-92  | 1.03018434 | 0.867 | 0.698 | 6.09E-88  |
| Hnrnpm        | 9.54E-82  | 1.0263008  | 0.845 | 0.654 | 1.62E-77  |
| 6330403K07Rik | 2.93E-60  | 1.01220174 | 0.668 | 0.313 | 4.98E-56  |
| Tubb2b        | 2.38E-52  | 1.0121785  | 0.556 | 0.181 | 4.04E-48  |
| Lmo4          | 1.32E-76  | 0.9823484  | 0.841 | 0.678 | 2.25E-72  |
| Dync1i2       | 2.92E-64  | 0.97961436 | 0.753 | 0.564 | 4.97E-60  |
| Nme1          | 1.54E-58  | 0.97926752 | 0.708 | 0.458 | 2.62E-54  |
| Isl1          | 1.12E-80  | 0.96432075 | 0.879 | 0.656 | 1.91E-76  |
| Tubb5         | 1.53E-61  | 0.9510302  | 0.765 | 0.557 | 2.60E-57  |
| Rtn1          | 2.36E-43  | 0.94851322 | 0.498 | 0.17  | 4.01E-39  |
| Rbp1          | 4.54E-50  | 0.93149818 | 0.429 | 0.044 | 7.71E-46  |
| Lockd         | 1.89E-33  | 0.92719933 | 0.493 | 0.225 | 3.20E-29  |
| Cbx3          | 4.73E-53  | 0.9195345  | 0.684 | 0.427 | 8.04E-49  |
| Dstn          | 3.84E-107 | 0.91289464 | 0.947 | 0.89  | 6.51E-103 |
| Gm10320       | 2.69E-47  | 0.905124   | 0.441 | 0.073 | 4.57E-43  |
| Pou3f3        | 2.94E-48  | 0.88588302 | 0.423 | 0.048 | 4.98E-44  |
| Sox9          | 1.33E-49  | 0.86978041 | 0.724 | 0.518 | 2.26E-45  |
| Eya1          | 2.91E-49  | 0.85822063 | 0.7   | 0.48  | 4.95E-45  |
| Etv5          | 7.53E-34  | 0.84329381 | 0.481 | 0.214 | 1.28E-29  |
| Amd1          | 3.23E-41  | 0.82006758 | 0.694 | 0.566 | 5.49E-37  |
| Hmcn1         | 3.74E-32  | 0.81888859 | 0.482 | 0.231 | 6.35E-28  |
| Cnot3         | 8.30E-44  | 0.8187037  | 0.657 | 0.454 | 1.41E-39  |
| Hn1           | 2.54E-41  | 0.8081985  | 0.58  | 0.308 | 4.31E-37  |
| Tle4          | 6.30E-35  | 0.79333462 | 0.569 | 0.337 | 1.07E-30  |
| Hmgb1         | 1.08E-90  | 0.78757176 | 0.965 | 0.949 | 1.84E-86  |
| Nfib          | 1.04E-31  | 0.77932845 | 0.56  | 0.352 | 1.76E-27  |
| Ddx5          | 8.07E-85  | 0.77438061 | 0.951 | 0.899 | 1.37E-80  |
| Nrep          | 3.07E-37  | 0.7692249  | 0.617 | 0.407 | 5.22E-33  |
| Nmt1          | 4.69E-37  | 0.76912201 | 0.641 | 0.463 | 7.97E-33  |

|               |          |            |       |       |          |
|---------------|----------|------------|-------|-------|----------|
| Ntm           | 2.29E-33 | 0.76250543 | 0.424 | 0.139 | 3.88E-29 |
| Bcl11a        | 7.10E-40 | 0.7544097  | 0.338 | 0.02  | 1.21E-35 |
| Lmo7          | 3.09E-28 | 0.73966967 | 0.395 | 0.141 | 5.25E-24 |
| Pcdh17        | 1.03E-15 | 0.73781141 | 0.529 | 0.456 | 1.75E-11 |
| Pantr1        | 1.32E-34 | 0.73284708 | 0.336 | 0.044 | 2.25E-30 |
| Zdhhc2        | 1.56E-34 | 0.71151045 | 0.68  | 0.566 | 2.64E-30 |
| Hmgb3         | 6.95E-24 | 0.70853212 | 0.485 | 0.3   | 1.18E-19 |
| Cdk4          | 2.60E-35 | 0.70671478 | 0.718 | 0.628 | 4.41E-31 |
| Nisch         | 1.36E-46 | 0.7029908  | 0.799 | 0.753 | 2.31E-42 |
| Mex3a         | 1.26E-35 | 0.70242847 | 0.7   | 0.615 | 2.14E-31 |
| 2810454H06Rik | 1.77E-30 | 0.70021602 | 0.36  | 0.09  | 3.01E-26 |
| Hsd11b2       | 4.52E-31 | 0.69997349 | 0.33  | 0.059 | 7.68E-27 |
| Ybx3          | 1.32E-25 | 0.69808671 | 0.67  | 0.597 | 2.24E-21 |
| Eif3j1        | 2.53E-26 | 0.69778271 | 0.54  | 0.372 | 4.30E-22 |
| Vangl2        | 5.51E-26 | 0.69135185 | 0.567 | 0.416 | 9.35E-22 |
| Gstm5         | 1.85E-19 | 0.69037191 | 0.559 | 0.476 | 3.14E-15 |
| Socs2         | 3.87E-36 | 0.68901339 | 0.739 | 0.601 | 6.57E-32 |
| Ezh2          | 1.53E-27 | 0.68249008 | 0.482 | 0.251 | 2.59E-23 |
| Celf2         | 8.64E-37 | 0.68023787 | 0.736 | 0.639 | 1.47E-32 |
| Cd24a         | 1.86E-72 | 0.67125772 | 0.951 | 0.899 | 3.16E-68 |
| Top1          | 1.18E-40 | 0.66062613 | 0.768 | 0.698 | 2.00E-36 |
| Mgea5         | 2.01E-25 | 0.66043271 | 0.568 | 0.419 | 3.41E-21 |
| Col11a1       | 1.77E-20 | 0.66005135 | 0.479 | 0.324 | 3.01E-16 |
| Slc1a3        | 5.44E-23 | 0.65850455 | 0.641 | 0.579 | 9.24E-19 |
| Amotl1        | 9.96E-22 | 0.65829335 | 0.414 | 0.214 | 1.69E-17 |
| Cdkn1b        | 1.67E-23 | 0.65791357 | 0.571 | 0.432 | 2.83E-19 |
| 1110004F10Rik | 5.97E-34 | 0.65745416 | 0.699 | 0.597 | 1.01E-29 |
| Rnd3          | 2.98E-21 | 0.65502235 | 0.551 | 0.419 | 5.06E-17 |
| Dclk1         | 2.57E-20 | 0.65490007 | 0.464 | 0.286 | 4.36E-16 |
| Sh3bgrl       | 1.25E-19 | 0.64943901 | 0.495 | 0.346 | 2.12E-15 |
| Tead2         | 1.27E-23 | 0.64138502 | 0.39  | 0.17  | 2.15E-19 |
| Sema6a        | 2.37E-27 | 0.63962257 | 0.664 | 0.595 | 4.02E-23 |
| Hnrnpab       | 7.05E-29 | 0.63554998 | 0.662 | 0.597 | 1.20E-24 |
| Fam32a        | 3.88E-23 | 0.63449535 | 0.493 | 0.3   | 6.59E-19 |
| Knop1         | 3.43E-29 | 0.63416164 | 0.711 | 0.687 | 5.82E-25 |
| Fabp5         | 2.52E-26 | 0.62971555 | 0.283 | 0.046 | 4.28E-22 |
| Rtn4          | 8.09E-20 | 0.62893513 | 0.551 | 0.438 | 1.37E-15 |
| Gm10260       | 2.20E-18 | 0.62149094 | 0.289 | 0.104 | 3.74E-14 |
| Cox7b         | 4.97E-29 | 0.61909207 | 0.759 | 0.738 | 8.43E-25 |
| Prpf4b        | 1.16E-34 | 0.61883964 | 0.774 | 0.729 | 1.97E-30 |

|         |           |            |       |       |           |
|---------|-----------|------------|-------|-------|-----------|
| Pdcd4   | 4.57E-34  | 0.61674901 | 0.75  | 0.665 | 7.76E-30  |
| Rnf121  | 3.62E-16  | 0.61590999 | 0.466 | 0.319 | 6.15E-12  |
| Ptch1   | 1.68E-15  | 0.61322236 | 0.524 | 0.449 | 2.86E-11  |
| Tgfb2   | 4.63E-44  | 0.60976155 | 0.866 | 0.852 | 7.86E-40  |
| Hmgn1   | 5.63E-70  | 0.60771493 | 0.967 | 0.976 | 9.56E-66  |
| Tia1    | 3.19E-23  | 0.60583263 | 0.602 | 0.522 | 5.41E-19  |
| Slco5a1 | 1.32E-19  | 0.60086965 | 0.413 | 0.22  | 2.24E-15  |
| Cyr61   | 1.55E-52  | -0.6100654 | 0.172 | 0.601 | 2.63E-48  |
| Fosb    | 9.78E-85  | -0.6105648 | 0.007 | 0.385 | 1.66E-80  |
| Fxyd3   | 1.18E-99  | -0.6175919 | 0.001 | 0.421 | 2.01E-95  |
| Cd63    | 4.00E-59  | -0.6270084 | 0.418 | 0.879 | 6.80E-55  |
| Jun     | 7.43E-48  | -0.6305624 | 0.51  | 0.89  | 1.26E-43  |
| Fam101b | 5.63E-80  | -0.6413201 | 0.152 | 0.698 | 9.56E-76  |
| Id1     | 2.10E-71  | -0.6421264 | 0.68  | 0.987 | 3.57E-67  |
| Eif3e   | 4.28E-93  | -0.652497  | 0.845 | 0.998 | 7.27E-89  |
| Cdo1    | 2.05E-89  | -0.6562021 | 0.121 | 0.678 | 3.49E-85  |
| Ier2    | 8.54E-66  | -0.6672536 | 0.412 | 0.901 | 1.45E-61  |
| Ano1    | 5.64E-104 | -0.6675442 | 0.007 | 0.46  | 9.58E-100 |
| Col9a3  | 6.59E-80  | -0.6893546 | 0.191 | 0.744 | 1.12E-75  |
| Col2a1  | 1.04E-74  | -0.6925921 | 0.669 | 0.954 | 1.77E-70  |
| Sfrp1   | 4.08E-51  | -0.7052014 | 0.685 | 0.932 | 6.92E-47  |
| Hes1    | 7.65E-54  | -0.7091122 | 0.419 | 0.857 | 1.30E-49  |
| Hcfc1r1 | 2.23E-97  | -0.7343399 | 0.124 | 0.705 | 3.79E-93  |
| Lect1   | 1.01E-54  | -0.741677  | 0.498 | 0.885 | 1.72E-50  |
| Sparc   | 7.74E-103 | -0.7526962 | 0.837 | 1     | 1.31E-98  |
| Col9a1  | 3.53E-80  | -0.7527821 | 0.295 | 0.846 | 5.99E-76  |
| mt-Co1  | 3.42E-182 | -0.7841567 | 1     | 1     | 5.80E-178 |
| Rplp0   | 1.85E-161 | -0.7972485 | 0.995 | 1     | 3.14E-157 |
| Ldha    | 3.63E-81  | -0.8008766 | 0.396 | 0.899 | 6.17E-77  |
| Rpl26   | 3.53E-187 | -0.8332937 | 0.999 | 1     | 6.00E-183 |
| Itih5   | 1.59E-86  | -0.8569552 | 0.289 | 0.848 | 2.70E-82  |
| Ldoc1   | 1.45E-126 | -0.8986625 | 0.011 | 0.548 | 2.47E-122 |
| Dbi     | 2.67E-102 | -0.9456705 | 0.448 | 0.938 | 4.54E-98  |
| Fbxo2   | 6.81E-119 | -0.9477634 | 0.622 | 0.989 | 1.16E-114 |
| Fst     | 4.09E-84  | -0.9510172 | 0.378 | 0.901 | 6.94E-80  |
| Dcn     | 6.26E-67  | -0.9547945 | 0.336 | 0.804 | 1.06E-62  |
| Krt18   | 3.05E-101 | -0.9569545 | 0.372 | 0.912 | 5.18E-97  |
| Mia     | 9.43E-103 | -0.9859454 | 0.212 | 0.822 | 1.60E-98  |
| Meg3    | 6.17E-75  | -1.00064   | 0.117 | 0.595 | 1.05E-70  |

|         |           |            |       |       |           |
|---------|-----------|------------|-------|-------|-----------|
| H19     | 2.36E-67  | -1.0252583 | 0.16  | 0.632 | 4.01E-63  |
| Igfbp5  | 2.25E-86  | -1.0453883 | 0.704 | 0.987 | 3.82E-82  |
| Clu     | 5.10E-139 | -1.2218694 | 0.919 | 1     | 8.66E-135 |
| Ubb     | 1.76E-159 | -1.2257631 | 0.575 | 0.989 | 2.98E-155 |
| Cdkn1a  | 1.01E-165 | -1.2438494 | 0.094 | 0.835 | 1.71E-161 |
| Fam132a | 2.33E-120 | -1.2727857 | 0.18  | 0.806 | 3.95E-116 |
| Lum     | 2.55E-142 | -1.4084655 | 0.243 | 0.91  | 4.33E-138 |
| Egr1    | 1.07E-176 | -1.482512  | 0.227 | 0.952 | 1.82E-172 |
| Btg2    | 5.51E-185 | -1.5575935 | 0.115 | 0.883 | 9.36E-181 |
| Fos     | 1.10E-177 | -1.6040292 | 0.131 | 0.885 | 1.87E-173 |
| Vim     | 5.02E-173 | -1.7274184 | 0.521 | 0.985 | 8.53E-169 |
