# Supplementary material for: SoxC transcription factors shape the epigenetic landscape to establish competence for sensory differentiation in the mammalian organ of Corti
Source: PubMed Central journal article supplement — Proc Natl Acad Sci U S A. 2023 Aug 16;120(34):e2301301120. doi: 10.1073/pnas.2301301120 (PMC10450657; doi:10.1073/pnas.2301301120), 2023-08-16
Supplement: pnas.2301301120.sd03.pdf [file pnas.2301301120.sd03.pdf]

**Table S3. Sox4-occupied genomic loci that gain accessibility between E12.0 and E13.5 and lose accessibility in SoxC cKO.**

| Chromosome | Start     | End       | Closest Gene  | Overlapping Gene             |
|------------|-----------|-----------|---------------|------------------------------|
| chr1       | 3170231   | 3170512   | Gm39585       |                              |
| chr1       | 14285637  | 14286219  | Eya1          |                              |
| chr1       | 15135196  | 15135527  | Kcnb2         |                              |
| chr1       | 19912353  | 19912823  | Gm32651       |                              |
| chr1       | 23214965  | 23215089  | Gm29506       | Ogfr1                        |
| chr1       | 27239787  | 27239993  | 4931408C20Rik |                              |
| chr1       | 30176077  | 30176535  | Gm31465       |                              |
| chr1       | 30548787  | 30548879  | Gm31581       |                              |
| chr1       | 30549011  | 30549063  | Gm31581       |                              |
| chr1       | 33778793  | 33779138  | Bag2          | Bend6;Dst;Prim2;Rab23;Zfp451 |
| chr1       | 68030567  | 68031046  | Gm15669       |                              |
| chr1       | 69858665  | 69858882  | Spag16        | Ikzf2;Spag16                 |
| chr1       | 70902416  | 70902758  | Gm29906       | Vwc2l                        |
| chr1       | 79314652  | 79314868  | Gm29536       | Scg2                         |
| chr1       | 82203834  | 82204034  | Mir6344       | Irs1;Rhbdd1                  |
| chr1       | 89799061  | 89799127  | 4933400F21Rik | Asb18;Gbx2;                  |
| chr1       | 90206848  | 90207018  | Ackr3         | Asb18;Iqca                   |
| chr1       | 94833235  | 94833582  | 4930440C22Rik |                              |
| chr1       | 99026124  | 99026184  | Gm7967        |                              |
| chr1       | 99074346  | 99074579  | Gm7967        |                              |
| chr1       | 99074693  | 99074893  | Gm7967        |                              |
| chr1       | 99970379  | 99970885  | Cntnap5b      |                              |
| chr1       | 101367971 | 101368185 | Gm31973       |                              |
| chr1       | 103472033 | 103472041 | Gm41924       |                              |
| chr1       | 103883325 | 103883552 | Gm41924       |                              |
| chr1       | 113540165 | 113540504 | LOC108167836  |                              |
| chr1       | 114457089 | 114457108 | Gm33042       |                              |
| chr1       | 115764486 | 115764742 | Cntnap5a      |                              |
| chr1       | 118228628 | 118228966 | Tsn           | Clasp1;Nifk                  |
| chr1       | 121366420 | 121366477 | 2210011K15Rik | Ccdc93;Htr5b;Insig2          |
| chr1       | 124517907 | 124518051 | Gm41941       |                              |
| chr1       | 125990610 | 125990950 | Gm35562       | Lypd1                        |
| chr1       | 129501948 | 129501996 | Gm36347       | Thsd7b                       |
| chr1       | 134658906 | 134658958 | Syt2          | Kdm5b;Mgat4e;Ppp1r12b;Rabif  |
| chr1       | 139348635 | 139348992 | Crb1          | Aspm;F13b;Zbtb41             |

|       |           |           |               |                                                                                                                    |
|-------|-----------|-----------|---------------|--------------------------------------------------------------------------------------------------------------------|
| chr1  | 143229449 | 143229710 | Gm35244       |                                                                                                                    |
| chr1  | 143352906 | 143353486 | Gm35244       |                                                                                                                    |
| chr1  | 151549267 | 151549798 | Fam129a       | Fam129a;Mir7682;Rnf2;Swf1;Trmt11                                                                                   |
| chr1  | 151880919 | 151881065 | Gm25279       | Edem3                                                                                                              |
| chr1  | 156190317 | 156190477 | Fam163a       | Nphs2;Tdrd5;Tor1aip1;Tor1aip2                                                                                      |
| chr1  | 158681187 | 158681220 | Mir488        |                                                                                                                    |
| chr1  | 163357874 | 163357997 | Prrx1         | Gorab                                                                                                              |
| chr1  | 163358237 | 163358461 | Prrx1         | Gorab                                                                                                              |
| chr1  | 164576786 | 164577003 | Gm26685       | Atp1b1                                                                                                             |
| chr1  | 172991023 | 172991572 | Gm35742       | Apcs;Olfr1406;Olfr1408;Olfr16                                                                                      |
| chr1  | 173384393 | 173384817 | Aim2          | Ackr1;Cadm3;Fcer1a;Mptx2;Olfr1404;<br>Olfr1406;Olfr218;Olfr418;Pydc4                                               |
| chr1  | 173973187 | 173973781 | Ifi202b       | Ifi203;Ifi205;Mnda;Mndal;Olfr231;Olfr420;<br>Olfr421-ps1;Olfr424;Olfr427;Olfr429;<br>Olfr430;Olfr432;Olfr433;Spta1 |
| chr1  | 175413921 | 175414200 | Rgs7          |                                                                                                                    |
| chr1  | 176013579 | 176013793 | Becn2         | Exo1;Pld5                                                                                                          |
| chr1  | 184192807 | 184193340 | Gm34177       | Dusp10                                                                                                             |
| chr1  | 194762321 | 194762375 | LOC108167784  | Cd34;Plxna2                                                                                                        |
| chr10 | 4278249   | 4278322   | Akap12        | Armt1;Rmnd1;Zbtb2                                                                                                  |
| chr10 | 5295168   | 5295762   | Syne1         |                                                                                                                    |
| chr10 | 6115101   | 6115215   | Rgs17         |                                                                                                                    |
| chr10 | 6115323   | 6115605   | Rgs17         |                                                                                                                    |
| chr10 | 6297920   | 6297966   | Gm3213        |                                                                                                                    |
| chr10 | 9508774   | 9509000   | Samd5         |                                                                                                                    |
| chr10 | 9509923   | 9510203   | Samd5         |                                                                                                                    |
| chr10 | 11801805  | 11802091  | Gm40601       |                                                                                                                    |
| chr10 | 12351089  | 12351407  | Utrn          |                                                                                                                    |
| chr10 | 19157534  | 19158089  | Gm20139       | Olig3;Tnfaip3                                                                                                      |
| chr10 | 27167397  | 27167797  | Gm40618       |                                                                                                                    |
| chr10 | 32871115  | 32871413  | Nkain2        |                                                                                                                    |
| chr10 | 33375631  | 33376088  | D830005E20Rik |                                                                                                                    |
| chr10 | 36119321  | 36119495  | Gm40623       |                                                                                                                    |
| chr10 | 38054035  | 38054421  | LOC108167804  |                                                                                                                    |
| chr10 | 46558689  | 46558999  | Gm40640       |                                                                                                                    |
| chr10 | 51006880  | 51007083  | Sim1          |                                                                                                                    |
| chr10 | 51123398  | 51123536  | Gm35917       |                                                                                                                    |
| chr10 | 60577337  | 60577672  | Cdh23         | Slc29a3                                                                                                            |
| chr10 | 64744113  | 64744590  | Gm28881       |                                                                                                                    |

|       |           |           |               |                                                   |
|-------|-----------|-----------|---------------|---------------------------------------------------|
| chr10 | 66172948  | 66173073  | Gm31056       |                                                   |
| chr10 | 66186849  | 66187050  | Gm31056       |                                                   |
| chr10 | 70359840  | 70360325  | Gm33704       | Mrln;Slc16a9                                      |
| chr10 | 71756211  | 71756502  | Gm34544       |                                                   |
| chr10 | 72287859  | 72288052  | Gm34609       |                                                   |
| chr10 | 72722653  | 72722925  | Zwint         | Zwint                                             |
| chr10 | 91156383  | 91156566  | Tmpo          | Apaf1;lkbip;Slc25a3                               |
| chr10 | 92647360  | 92647669  | Gm31822       | Nedd1                                             |
| chr10 | 105760736 | 105760872 | Mettl25       | Ccdc59;Tmtc2                                      |
| chr10 | 110352562 | 110352708 | Nav3          |                                                   |
| chr10 | 114912607 | 114912630 | Gm40767       | Trhde                                             |
| chr10 | 118984391 | 118984566 | Gm33624       | Dyrk2                                             |
| chr10 | 124411816 | 124411995 | 4930503E24Rik |                                                   |
| chr11 | 8293699   | 8294029   | Tns3          |                                                   |
| chr11 | 8453298   | 8453611   | Tns3          |                                                   |
| chr11 | 13149958  | 13150078  | Cobl          |                                                   |
| chr11 | 18305219  | 18305290  | Gm12022       |                                                   |
| chr11 | 19092848  | 19093301  | 4933406G16Rik | Meis1                                             |
| chr11 | 24131742  | 24132311  | 4930538E20Rik | Bcl11a                                            |
| chr11 | 25314702  | 25314803  | 4933427E13Rik |                                                   |
| chr11 | 26071832  | 26072082  | Mir6372       |                                                   |
| chr11 | 28685003  | 28685254  | 2810471M01Rik | Ccdc85a;Efemp1;Mir216a;Mir216b;<br>Mir216c;Mir217 |
| chr11 | 42599137  | 42599456  | Gabrb2        |                                                   |
| chr11 | 64156554  | 64156880  | Gm12290       | Cox10                                             |
| chr11 | 64546340  | 64546447  | F930015N05Rik | Hs3st3a1                                          |
| chr11 | 71902746  | 71902938  | LOC108167908  | Aipl1;Fam64a;Wscd1                                |
| chr11 | 90538523  | 90538878  | Gm34850       | Cox11;Hlf;Stxbp4;Tom1l1                           |
| chr11 | 108709949 | 108709973 | Cep112        |                                                   |
| chr12 | 9132567   | 9133025   | Ttc32         | Matn3;Wdr35                                       |
| chr12 | 13412582  | 13412905  | Nbas          | Ddx1                                              |
| chr12 | 29137164  | 29137269  | Gm31333       |                                                   |
| chr12 | 35334815  | 35335047  | Mir680-3      | Ahr                                               |
| chr12 | 37774208  | 37774358  | Dgkb          |                                                   |
| chr12 | 37849180  | 37849330  | Dgkb          |                                                   |
| chr12 | 38579439  | 38579642  | 4930428E07Rik |                                                   |
| chr12 | 39095184  | 39095223  | Gm34809       |                                                   |
| chr12 | 50128267  | 50128508  | Gm40419       |                                                   |
| chr12 | 51355519  | 51355667  | G2e3          | Scfd1                                             |

|       |           |           |               |                                                                   |
|-------|-----------|-----------|---------------|-------------------------------------------------------------------|
| chr12 | 58085842  | 58085989  | Sstr1         | Clec14a                                                           |
| chr12 | 59414289  | 59414303  | Fbxo33        |                                                                   |
| chr12 | 59414484  | 59414588  | Fbxo33        |                                                                   |
| chr12 | 59708822  | 59708971  | Gm40430       |                                                                   |
| chr12 | 59804133  | 59804287  | Gm40430       |                                                                   |
| chr12 | 60367446  | 60367674  | Gm32936       |                                                                   |
| chr12 | 61147002  | 61147217  | LOC108167369  |                                                                   |
| chr12 | 65593793  | 65593991  | Wdr20rt       |                                                                   |
| chr12 | 65594048  | 65594291  | Wdr20rt       |                                                                   |
| chr12 | 82424860  | 82424952  | Gm30916       | Rgs6;Sipa1l1                                                      |
| chr12 | 88377229  | 88377232  | 3200001D21Rik | Adck1                                                             |
| chr12 | 89079244  | 89079307  | Gm40537       | Nrxn3                                                             |
| chr12 | 89086334  | 89086512  | Gm40537       | Nrxn3                                                             |
| chr12 | 89258477  | 89258685  | Gm40537       |                                                                   |
| chr12 | 89258925  | 89259074  | Gm40537       |                                                                   |
| chr12 | 90210146  | 90210475  | Gm40538       |                                                                   |
| chr12 | 91265525  | 91265838  | Cep128        | Tshr                                                              |
| chr12 | 91436485  | 91436838  | Tshr          | Cep128;Gtf2a1                                                     |
| chr12 | 94640284  | 94640329  | Mir8099-2     |                                                                   |
| chr12 | 95818050  | 95818348  | Flrt2         |                                                                   |
| chr12 | 98339768  | 98340179  | Gpr65         | Galc;Gpr65;Kcnk10                                                 |
| chr12 | 101020176 | 101020589 | Mir1190       | Ccdc88c;Gpr68;Kif4-ps;Smek1                                       |
| chr12 | 110347562 | 110347831 | Gm6988        | Dio3;Dio3os;Mir1247;Ppp2r5c                                       |
| chr12 | 116823778 | 116823874 | Gm31336       |                                                                   |
| chr13 | 6597794   | 6597825   | Gm35730       | Pfkip;Pitrm1                                                      |
| chr13 | 12159044  | 12159096  | Gm10336       | Actn2;Mtr;Ryr2                                                    |
| chr13 | 12829022  | 12829331  | LOC105245453  | Gpr137b-ps;Prl2c2;Prl2c3                                          |
| chr13 | 14945052  | 14945372  | Gm31066       |                                                                   |
| chr13 | 15949430  | 15949506  | Gm31450       | Inhba                                                             |
| chr13 | 17412468  | 17412954  | Gm40826       |                                                                   |
| chr13 | 19464161  | 19464430  | 9330199G10Rik | Epdr1;Sfrp4;Stard3nl                                              |
| chr13 | 20519787  | 20519971  | Elmo1         |                                                                   |
| chr13 | 36760936  | 36761090  | Nrn1          |                                                                   |
| chr13 | 42198101  | 42198860  | Gm32778       | Edn1;Hivep1                                                       |
| chr13 | 48166993  | 48167189  | Gm36346       | Id4                                                               |
| chr13 | 66996903  | 66996982  | 4933433G19Rik | Mterf3;Ptdss1;Rsl1;Rslcan18;Uqcrb;<br>Zfp455;Zfp708;Zfp712;Zfp759 |
| chr13 | 69236318  | 69236738  | Gm35444       |                                                                   |
| chr13 | 74817932  | 74818377  | Cast          | Erap1                                                             |

|       |           |           |               |                                                          |
|-------|-----------|-----------|---------------|----------------------------------------------------------|
| chr13 | 75368473  | 75368966  | Mir682        |                                                          |
| chr13 | 78940888  | 78941210  | Gm32067       |                                                          |
| chr13 | 83953181  | 83953207  | 2810049E08Rik |                                                          |
| chr13 | 84681001  | 84681780  | Gm34246       |                                                          |
| chr13 | 90753881  | 90754256  | Atp6ap1l      | Rps23                                                    |
| chr13 | 91855123  | 91855546  | Ckmt2         | Acot12;Ckmt2;Zcchc9                                      |
| chr13 | 96073585  | 96073908  | Sv2c          | Iqgap2;Sv2c                                              |
| chr13 | 99384653  | 99385126  | Gm41037       | Map1b;Mrps27;Ptcd2;Zfp366                                |
| chr13 | 100566270 | 100566323 | Ocln          | Ak6;Ccdc125;Cdk7;Gtf2h2;Marveld2;Mrps36;Naip1;Rad17;Taf9 |
| chr13 | 101110059 | 101110202 | Gm41042       |                                                          |
| chr13 | 114532465 | 114532813 | Fst           | Ndufs4                                                   |
| chr13 | 116279549 | 116279671 | Isl1          |                                                          |
| chr14 | 9606600   | 9606726   | Gm41096       |                                                          |
| chr14 | 14309551  | 14309577  | Olfr31        | Il3ra;Olfr720;Psmid6                                     |
| chr14 | 15333334  | 15333426  | Gm31577       | Lrrc3b                                                   |
| chr14 | 15472022  | 15472399  | Lrrc3b        |                                                          |
| chr14 | 17358039  | 17358389  | Gm32121       |                                                          |
| chr14 | 18378045  | 18378246  | Ube2e1        | Nkiras1;Nr1d2;Rpl15                                      |
| chr14 | 42134940  | 42135090  | Gm5376        |                                                          |
| chr14 | 57314155  | 57314377  | Gm41161       | Cryl1;Gjb6;Ift88                                         |
| chr14 | 64265727  | 64265970  | Gm41176       | Msra;Prss51;Prss52;Prss55                                |
| chr14 | 68190159  | 68190320  | Nefm          | Nefl                                                     |
| chr14 | 78049761  | 78049963  | Fam216b       | Dnajc15;Epsti1;Gm30608;Mir1971                           |
| chr14 | 78050273  | 78050307  | Fam216b       | Dnajc15;Epsti1;Gm30608;Mir1971                           |
| chr14 | 81278278  | 81278704  | Gm41219       |                                                          |
| chr14 | 81758541  | 81758779  | Gm41219       |                                                          |
| chr14 | 86326146  | 86326348  | Gm32860       |                                                          |
| chr14 | 92000449  | 92000646  | Gm33246       |                                                          |
| chr14 | 92635754  | 92635794  | Gm33349       |                                                          |
| chr14 | 96885505  | 96885749  | Gm33525       |                                                          |
| chr14 | 99192252  | 99192302  | Pibf1         | Bora;Dis3;Klf5;Mzt1                                      |
| chr14 | 104665759 | 104665807 | D130009I18Rik | Pou4f1;Rnf219                                            |
| chr14 | 107186154 | 107186449 | Gm41241       |                                                          |
| chr14 | 107368459 | 107368719 | Gm41242       |                                                          |
| chr14 | 108791545 | 108791787 | Gm30157       | Slitrk1                                                  |
| chr14 | 109266601 | 109267097 | Gm30216       |                                                          |
| chr14 | 109550724 | 109550815 | Gm30216       |                                                          |
| chr14 | 109610163 | 109610368 | Gm30216       |                                                          |

|       |           |           |               |                                                                                    |
|-------|-----------|-----------|---------------|------------------------------------------------------------------------------------|
| chr14 | 113395551 | 113395776 | Gm41243       |                                                                                    |
| chr14 | 115836556 | 115836875 | 4930505G20Rik |                                                                                    |
| chr14 | 119103347 | 119103405 | Gm16835       | Dnajc3;Dzip1;Hs6st3;Uggt2                                                          |
| chr14 | 119831859 | 119831937 | Gm41249       |                                                                                    |
| chr14 | 119831989 | 119832182 | Gm41249       |                                                                                    |
| chr14 | 123304973 | 123304976 | AA536875      |                                                                                    |
| chr14 | 124332735 | 124332769 | Fgf14         |                                                                                    |
| chr15 | 3295812   | 3295984   | Gm41254       | Ccdc152;Sepp1                                                                      |
| chr15 | 4349416   | 4349570   | Plcx3         |                                                                                    |
| chr15 | 4558300   | 4558432   | C6            | Plcx3                                                                              |
| chr15 | 10685694  | 10685954  | Rai14         | Brix1;Rad1;Ttc23l                                                                  |
| chr15 | 11310114  | 11310517  | Gm34444       | Tars                                                                               |
| chr15 | 13320392  | 13320914  | LOC108168242  | Cdh6                                                                               |
| chr15 | 13751658  | 13751712  | LOC108168242  |                                                                                    |
| chr15 | 14127657  | 14127909  | LOC108168242  |                                                                                    |
| chr15 | 22170636  | 22170791  | Gm41278       |                                                                                    |
| chr15 | 24567006  | 24567244  | Gm35827       |                                                                                    |
| chr15 | 26533899  | 26534353  | Fbxl7         |                                                                                    |
| chr15 | 31676759  | 31677047  | Gm32383       | Cct5;Cmb1;Fam173b;March6                                                           |
| chr15 | 32160474  | 32160482  | Gm32499       | Sema5a;Snhg18;Snord123;Tas2r119                                                    |
| chr15 | 32377312  | 32377637  | Gm32562       | Sema5a;Snhg18;Snord123                                                             |
| chr15 | 34686410  | 34686731  | Nipal2        | Kcns2;Pop1;Rida                                                                    |
| chr15 | 44259920  | 44260276  | Gm33793       | Eny2;Nudcd1;Pkhd1l1;Trhr                                                           |
| chr15 | 46480096  | 46480176  | 4930523O13Rik |                                                                                    |
| chr15 | 46480318  | 46480532  | 4930523O13Rik |                                                                                    |
| chr15 | 50508060  | 50508295  | Trps1         |                                                                                    |
| chr15 | 52384232  | 52384292  | Gm41321       | Slc30a8                                                                            |
| chr15 | 53492198  | 53492394  | Mir28c        | Ext1                                                                               |
| chr15 | 53848643  | 53848762  | Samd12        |                                                                                    |
| chr15 | 54124644  | 54124885  | Tnfrsf11b     |                                                                                    |
| chr15 | 55155491  | 55155848  | Deptor        | Col14a1;Dsc1;Taf2                                                                  |
| chr15 | 61782540  | 61782707  | D030024E09Rik |                                                                                    |
| chr15 | 61921709  | 61921821  | Myc           | Pvt1                                                                               |
| chr15 | 62801750  | 62801997  | Gm41333       |                                                                                    |
| chr15 | 63532271  | 63532647  | Gm20740       |                                                                                    |
| chr15 | 65449292  | 65449510  | Gm41339       |                                                                                    |
| chr15 | 79973872  | 79974054  | Cbx7          | Apobec3;Cbx6;Dnal4;Mgat3;Mir7213;Npcd;Nptxr;Pdgb;Rpl3;Snord43;Snord83b;Syngr1;Tab1 |

|       |          |          |               |                                                      |
|-------|----------|----------|---------------|------------------------------------------------------|
| chr15 | 84310374 | 84310737 | Parvg         | Mir6392;Parvb;Pnpla3;Pnpla5;Samm50                   |
| chr16 | 7197377  | 7197829  | Rbfox1        |                                                      |
| chr16 | 9463957  | 9464285  | Gm41418       |                                                      |
| chr16 | 10639064 | 10639243 | Clec16a       | Ciita;Dexi;Prm1;Prm2;Prm3;Rmi2;<br>Socs1;Tnp2;Tvp23a |
| chr16 | 13206675 | 13206864 | Gm32596       | Ercc4;Gm15738;Mkl2                                   |
| chr16 | 21690020 | 21690407 | 2510009E07Rik | Ehhadh;Map3k13                                       |
| chr16 | 27017453 | 27017814 | Gmnc          |                                                      |
| chr16 | 28668814 | 28669262 | LOC108168283  | Fgf12;Mb21d2;Mir690                                  |
| chr16 | 33005449 | 33005560 | lqcg          | Fyttl1;Lmln;Lrch3;Mir1947;Osbp11;<br>Rpl35a;Rubcn    |
| chr16 | 40143318 | 40143502 | Gm29907       |                                                      |
| chr16 | 49408602 | 49408877 | Gm4802        |                                                      |
| chr16 | 52180343 | 52180398 | Cblb          |                                                      |
| chr16 | 52388520 | 52388742 | Gm41461       | Alcam                                                |
| chr16 | 54335216 | 54335614 | Zpld1         |                                                      |
| chr16 | 57038662 | 57038938 | Tmem45a2      | Lnp1;Nit2;Tbc1d23;Tmem45a;Tomm70a                    |
| chr16 | 60368084 | 60368272 | Epha6         |                                                      |
| chr16 | 60368358 | 60368587 | Epha6         |                                                      |
| chr16 | 60687323 | 60687424 | Epha6         |                                                      |
| chr16 | 65065444 | 65065489 | Htr1f         |                                                      |
| chr16 | 65850125 | 65850353 | Vgll3         |                                                      |
| chr16 | 65964371 | 65964676 | Vgll3         |                                                      |
| chr16 | 66015481 | 66015537 | Vgll3         |                                                      |
| chr16 | 71356123 | 71356236 | 4930567J20Rik |                                                      |
| chr16 | 73245833 | 73246007 | 4930500H12Rik |                                                      |
| chr16 | 74739708 | 74740090 | Robo2         |                                                      |
| chr16 | 74811225 | 74811358 | Robo2         |                                                      |
| chr16 | 74895308 | 74895393 | Robo2         |                                                      |
| chr16 | 76248883 | 76248942 | Gm30507       | Nrip1                                                |
| chr16 | 77094308 | 77094483 | Usp25         |                                                      |
| chr16 | 78976480 | 78976727 | Chodl         | Tmprss15                                             |
| chr16 | 82152630 | 82153016 | Gm41480       |                                                      |
| chr16 | 85988347 | 85988665 | Adamts5       | Adamts1                                              |
| chr17 | 11823734 | 11823817 | D17Ertd648e   |                                                      |
| chr17 | 29874320 | 29874736 | Mdga1         | Ccdc167;Zfand3                                       |
| chr17 | 41059927 | 41060092 | Mut           | Cenpq;Glyatl3                                        |
| chr17 | 42157097 | 42157347 | Ptchd4        |                                                      |

|       |          |          |               |                                                                                        |
|-------|----------|----------|---------------|----------------------------------------------------------------------------------------|
| chr17 | 42267502 | 42268039 | Ptchd4        |                                                                                        |
| chr17 | 49500497 | 49500632 | Daam2         | Kif6;Mocs1                                                                             |
| chr17 | 53973216 | 53973489 | Sult1c1       | Mark1-ps1;Sult1c2                                                                      |
| chr17 | 54239804 | 54239821 | Slc5a7        |                                                                                        |
| chr17 | 58111160 | 58111254 | Cntnap5c      |                                                                                        |
| chr17 | 63861038 | 63861233 | Fer           |                                                                                        |
| chr17 | 67816211 | 67816621 | Lama1         | Arhgap28;Lrrc30                                                                        |
| chr17 | 68999240 | 68999660 | Gm36437       | Epb41l3;Tmem200c                                                                       |
| chr17 | 75233074 | 75233551 | Ltbp1         |                                                                                        |
| chr17 | 81455394 | 81455557 | Gm41627       |                                                                                        |
| chr17 | 85440451 | 85440858 | Six3          | Six3os1                                                                                |
| chr17 | 89297893 | 89297931 | 4933400B14Rik |                                                                                        |
| chr17 | 91268767 | 91268928 | Nrxn1         |                                                                                        |
| chr17 | 91543324 | 91543528 | Gm41654       |                                                                                        |
| chr17 | 94470084 | 94470277 | Mettl4        |                                                                                        |
| chr18 | 7121584  | 7122011  | LOC108168391  | Armc4;Mkx                                                                              |
| chr18 | 7257812  | 7257962  | Armc4         | Mpp7                                                                                   |
| chr18 | 17052733 | 17053127 | Gm41674       |                                                                                        |
| chr18 | 20012372 | 20012523 | Dsc3          | Dsc1;Dsc2                                                                              |
| chr18 | 22908128 | 22908317 | Nol4          |                                                                                        |
| chr18 | 24359585 | 24359702 | Gm38410       | Galnt1;Mir187;Rprd1a                                                                   |
| chr18 | 40759041 | 40759571 | Gm41710       |                                                                                        |
| chr18 | 41429174 | 41429687 | Preli2        |                                                                                        |
| chr18 | 50364646 | 50364765 | Fam170a       |                                                                                        |
| chr18 | 52236680 | 52237012 | Ftmt          |                                                                                        |
| chr18 | 53866569 | 53866892 | Csnk1g3       | Cep120                                                                                 |
| chr18 | 61634924 | 61635024 | Gm35607       | Ablim3;Afap1l1;Arhgef37;Bvht;Carmn;<br>Csnk1a1;Grpel2;Il17b;Mir143;Mir145a;<br>Pcyox1l |
| chr18 | 63950851 | 63951104 | Wdr7          |                                                                                        |
| chr18 | 65119778 | 65119978 | Nedd4l        |                                                                                        |
| chr18 | 68370259 | 68370655 | Gm29677       | Ldlrad4;Mc2r;Mc5r;Mir7219;Rnmt                                                         |
| chr18 | 72023567 | 72023998 | Dcc           |                                                                                        |
| chr18 | 81043166 | 81043533 | Sall3         | Atp9b                                                                                  |
| chr18 | 82396353 | 82397287 | Galr1         | Mbp                                                                                    |
| chr18 | 85331217 | 85331467 | Gm32291       |                                                                                        |
| chr18 | 87419097 | 87419515 | Cbln2         |                                                                                        |
| chr19 | 14971722 | 14971825 | LOC108168406  |                                                                                        |
| chr19 | 17567164 | 17567437 | Gm41812       | Gcnt1;Pcsk5;Rfk                                                                        |

|       |           |           |               |                                                                      |
|-------|-----------|-----------|---------------|----------------------------------------------------------------------|
| chr19 | 18935955  | 18935958  | Rorb          | Trpm6                                                                |
| chr19 | 30505248  | 30505435  | Ppp1r2-ps3    | Dkk1                                                                 |
| chr19 | 36213676  | 36213737  | LOC108168426  | Ankrd1;Pcgf5;Rpp30                                                   |
| chr19 | 48160980  | 48161349  | Sorcs3        |                                                                      |
| chr19 | 50546412  | 50546512  | Gm26629       | Sorcs1                                                               |
| chr19 | 50546548  | 50546703  | Gm26629       | Sorcs1                                                               |
| chr19 | 53002874  | 53003286  | Mir6407       | Add3;Xpnpep1                                                         |
| chr2  | 3964487   | 3964669   | Frmd4a        | Fam107b                                                              |
| chr2  | 13061479  | 13061693  | C1ql3         | Pter                                                                 |
| chr2  | 13061830  | 13061911  | C1ql3         | Pter                                                                 |
| chr2  | 13061978  | 13062132  | C1ql3         | Pter                                                                 |
| chr2  | 13062733  | 13062776  | C1ql3         | Pter                                                                 |
| chr2  | 13175748  | 13175887  | Rsu1          | C1ql3                                                                |
| chr2  | 14271207  | 14271503  | Mir511        | Mrc1;Slc39a12;Stam;Stamos;Tmem236                                    |
| chr2  | 23901804  | 23902000  | Hnmt          | Tbpl2                                                                |
| chr2  | 29646859  | 29646929  | Rapgef1       | Cercam;Coq4;Mir133c;Mir219a-2;<br>Mir219b;Rapgef1;Slc27a4;Trub2;Urm1 |
| chr2  | 40479431  | 40479640  | Gm30138       |                                                                      |
| chr2  | 43455512  | 43455758  | Kynu          |                                                                      |
| chr2  | 43456017  | 43456181  | Kynu          |                                                                      |
| chr2  | 43915714  | 43915948  | Gm39804       | Arhgap15;Arhgap15os                                                  |
| chr2  | 46556863  | 46557102  | Gm13470       |                                                                      |
| chr2  | 53603893  | 53604208  | Gm38481       |                                                                      |
| chr2  | 56991978  | 56992182  | Nr4a2         |                                                                      |
| chr2  | 62493628  | 62494052  | Gcg           | Dpp4;Fap;Gca                                                         |
| chr2  | 64171575  | 64171652  | Fign          |                                                                      |
| chr2  | 67043157  | 67043196  | Gm1322        |                                                                      |
| chr2  | 74408814  | 74408847  | 4930441J16Rik | Lnp                                                                  |
| chr2  | 77994637  | 77995012  | Cwc22         |                                                                      |
| chr2  | 80852860  | 80852955  | Gm36282       |                                                                      |
| chr2  | 83011005  | 83011038  | Fsip2         |                                                                      |
| chr2  | 95210662  | 95210861  | Gm13794       |                                                                      |
| chr2  | 96287713  | 96287809  | Lrrc4c        |                                                                      |
| chr2  | 97609397  | 97609554  | Lrrc4c        |                                                                      |
| chr2  | 99726601  | 99726807  | Gm33780       |                                                                      |
| chr2  | 100813397 | 100813946 | Gm39886       |                                                                      |
| chr2  | 106305751 | 106306131 | Gm36036       | Dcdc5                                                                |
| chr2  | 114588803 | 114589071 | Dph6          |                                                                      |

|      |           |           |               |                                                                                                |
|------|-----------|-----------|---------------|------------------------------------------------------------------------------------------------|
| chr2 | 117176772 | 117176925 | Mir674        | Fam98b;Rasgrp1;Spred1                                                                          |
| chr2 | 124329753 | 124330003 | 4930583P06Rik |                                                                                                |
| chr2 | 125617082 | 125617347 | Cep152        | Eid1;Fbn1;Secisbp2l;Shc4                                                                       |
| chr2 | 136824847 | 136825159 | LOC108168797  | Mkks;Slx4ip;Snap25                                                                             |
| chr2 | 168467788 | 168468033 | Gm33413       | Kcng1;Mir7004;Nfatc2                                                                           |
| chr2 | 181192207 | 181192448 | Ppdpf         | Arfrp1;Chrna4;Col20a1;Eef1a2;Helz2;<br>Kcnq2;Lime1;Ptk6;Rtel1;Slc2a4rg-ps;<br>Srms;Stmn3;Zgpat |
| chr2 | 181931193 | 181931406 | Gm40034       | Myt1;Pcmd2;Polr3k                                                                              |
| chr3 | 7667928   | 7668027   | LOC102634900  | Il7                                                                                            |
| chr3 | 11701087  | 11701277  | Gm10745       |                                                                                                |
| chr3 | 14002257  | 14002516  | Raly1         |                                                                                                |
| chr3 | 15016054  | 15016080  | Gm42000       | Car2;Car3                                                                                      |
| chr3 | 16866543  | 16866728  | Gm42184       |                                                                                                |
| chr3 | 16942648  | 16942936  | Gm42184       |                                                                                                |
| chr3 | 17669298  | 17669471  | Gm30340       | Mir124-2hg;Mir124a-2                                                                           |
| chr3 | 18937041  | 18937266  | Armc1         |                                                                                                |
| chr3 | 18937414  | 18937448  | Armc1         |                                                                                                |
| chr3 | 19549550  | 19549846  | Dnajc5b       | Crh;Trim55                                                                                     |
| chr3 | 21535054  | 21535159  | Gm31610       |                                                                                                |
| chr3 | 23164379  | 23164811  | 4930412E21Rik |                                                                                                |
| chr3 | 27372324  | 27372507  | Ghsr          | Fndc3b;Nceh1;Tnfsf10                                                                           |
| chr3 | 33115928  | 33116103  | Pex5l         |                                                                                                |
| chr3 | 34908640  | 34908950  | Mir6378       |                                                                                                |
| chr3 | 36263379  | 36263517  | Gm42208       | Acad9;Qrfpr                                                                                    |
| chr3 | 36352368  | 36352377  | Gm42209       | Anxa5;Mir7009;Qrfpr                                                                            |
| chr3 | 36636781  | 36637172  | Gm35856       | Anxa5;Bbs7;Ccna2;Exosc9;Mir7009;Trpc3                                                          |
| chr3 | 38962388  | 38962841  | Fat4          |                                                                                                |
| chr3 | 39272719  | 39272874  | Gm42214       |                                                                                                |
| chr3 | 40682102  | 40682299  | Intu          | Abhd18;Hspa4l;Mfsd8;Plk4;Slc25a31                                                              |
| chr3 | 42327782  | 42327895  | D3Ert751e     |                                                                                                |
| chr3 | 46701784  | 46701810  | Mir6379       | Mir6379                                                                                        |
| chr3 | 53143269  | 53143808  | Lhfp          | Cog6                                                                                           |
| chr3 | 53244649  | 53244864  | Gm40048       |                                                                                                |
| chr3 | 55337012  | 55337178  | Gm40051       | Ccdc169;Dclk1;Sohlh2                                                                           |
| chr3 | 59899827  | 59899932  | C130079G13Rik | Aadac;Aadacl2;Sucnr1                                                                           |
| chr3 | 60789587  | 60789751  | Gm38326       |                                                                                                |

|      |           |           |               |                                                               |
|------|-----------|-----------|---------------|---------------------------------------------------------------|
| chr3 | 63101342  | 63101776  | Gm40064       | Mme                                                           |
| chr3 | 64831210  | 64831440  | Vmn2r-ps11    | Kcnab1                                                        |
| chr3 | 67105129  | 67105415  | Rsrc1         | Shox2                                                         |
| chr3 | 70298037  | 70298250  | Otol1         |                                                               |
| chr3 | 99301400  | 99301642  | Tbx15         | Mir6481;Wars2                                                 |
| chr3 | 99337342  | 99337541  | Tbx15         | Mir6481;Wars2                                                 |
| chr3 | 115324512 | 115324795 | Olfm3         |                                                               |
| chr3 | 115324835 | 115325073 | Olfm3         |                                                               |
| chr3 | 124595002 | 124595087 | 1700003H04Rik |                                                               |
| chr3 | 128148940 | 128149545 | D030025E07Rik |                                                               |
| chr3 | 130494257 | 130494354 | Etnppl        |                                                               |
| chr3 | 131560990 | 131561541 | Papss1        | Sgms2                                                         |
| chr3 | 132642089 | 132642164 | Gimd1         | Aimp1;Tbck                                                    |
| chr3 | 133331540 | 133331584 | Ppa2          | Arhgef38                                                      |
| chr3 | 133750138 | 133750347 | Gm6135        |                                                               |
| chr3 | 138653669 | 138654011 | 4930425O10Rik | Metap1;Mir1956;Tspan5                                         |
| chr3 | 143748882 | 143748888 | Gm33867       |                                                               |
| chr3 | 150352952 | 150353218 | Gm40178       |                                                               |
| chr3 | 151331331 | 151331506 | 4930555A03Rik | Adgrl4                                                        |
| chr3 | 151402743 | 151403243 | Adgrl4        |                                                               |
| chr3 | 151749537 | 151749714 | Ifi44         | Ptgfr                                                         |
| chr3 | 157709689 | 157709801 | Ptger3        | Zranb2                                                        |
| chr3 | 157709905 | 157710126 | Ptger3        | Zranb2                                                        |
| chr3 | 157710187 | 157710379 | Ptger3        | Zranb2                                                        |
| chr3 | 158131797 | 158131991 | Lrrc7         | Ankrd13c;Lrrc40;Srsf11                                        |
| chr3 | 159186973 | 159187080 | Gm20752       |                                                               |
| chr4 | 5059387   | 5059421   | Impad1        |                                                               |
| chr4 | 14278956  | 14279033  | Gm2560        |                                                               |
| chr4 | 14298077  | 14298526  | Gm2560        |                                                               |
| chr4 | 15535142  | 15535328  | Gm29829       |                                                               |
| chr4 | 15535362  | 15535629  | Gm29829       |                                                               |
| chr4 | 21310157  | 21310165  | Prdm13        |                                                               |
| chr4 | 24429415  | 24429591  | Gm27243       | Mms22l                                                        |
| chr4 | 24631196  | 24631530  | Gm31436       | Klhl32;Mms22l                                                 |
| chr4 | 32197679  | 32198023  | Gm42266       | Bach2                                                         |
| chr4 | 37727421  | 37727511  | Gm12374       |                                                               |
| chr4 | 52961581  | 52961649  | Gm33479       | Abca1;Nipsnap3a;Nipsnap3b;Olfr270;<br>Olfr272;Olfr273;Olfr275 |
| chr4 | 55519396  | 55519677  | Klf4          | Rad23b                                                        |

|      |           |           |               |                                                             |
|------|-----------|-----------|---------------|-------------------------------------------------------------|
| chr4 | 66330580  | 66330946  | Astn2         |                                                             |
| chr4 | 69582071  | 69582565  | Gm31905       |                                                             |
| chr4 | 70906972  | 70907191  | Gm11228       |                                                             |
| chr4 | 72373702  | 72373934  | C630043F03Rik | Tle1                                                        |
| chr4 | 72765605  | 72765919  | Aldoart1      |                                                             |
| chr4 | 73110984  | 73111050  | Aldoart1      |                                                             |
| chr4 | 77741412  | 77741419  | Ptprd         |                                                             |
| chr4 | 79114804  | 79115245  | A430085M09Rik |                                                             |
| chr4 | 79621554  | 79621923  | Gm32658       |                                                             |
| chr4 | 79973837  | 79974189  | Gm32658       |                                                             |
| chr4 | 93184400  | 93184631  | Tusc1         |                                                             |
| chr4 | 93184665  | 93184840  | Tusc1         |                                                             |
| chr4 | 93528330  | 93528605  | Gm31828       | Tusc1                                                       |
| chr4 | 94407213  | 94407315  | LOC108168967  | Caap1;ift74;Plaa                                            |
| chr4 | 98118614  | 98119010  | Gm34784       |                                                             |
| chr4 | 107028419 | 107028591 | Mrpl37        | Cdcp2;Cyb5rl;Ldlrad1;Ssbp3;Tceanc2;Tmem59                   |
| chr4 | 107139140 | 107139478 | Tceanc2       | Cdcp2;Cyb5rl;Dio1;Hspb11;Ldlrad1;Lrrc42;Mrpl37;Tmem59;Yipf1 |
| chr4 | 108843179 | 108843297 | Kti12         | Btf3l4;Mir761;Nrd1;Rab3b;Txndc12;Zfyve9                     |
| chr4 | 129020311 | 129020778 | Ak2           | Azin2;Fndc5;Hpca;Rnf19b;S100pbp;Tmem54;Trim62;Yars          |
| chr4 | 139206797 | 139206982 | Capzb         | Akr7a5;Emc1;Htr6;Minos1;Mrto4;Nbl1;Pqlc2;Ubr4               |
| chr4 | 144468825 | 144468912 | Aadacl3       | Pramef12;Pramel5                                            |
| chr4 | 151489528 | 151489758 | Gm30344       |                                                             |
| chr4 | 154549758 | 154549924 | Gm13133       | Actrt2;Prdm16                                               |
| chr5 | 5190749   | 5191377   | Cdk14         |                                                             |
| chr5 | 6266832   | 6267052   | Gm40263       |                                                             |
| chr5 | 12638617  | 12638715  | Sema3d        |                                                             |
| chr5 | 13139019  | 13139071  | Sema3a        |                                                             |
| chr5 | 16968537  | 16968663  | LOC108169105  |                                                             |
| chr5 | 21989385  | 21989625  | Slc26a5       |                                                             |
| chr5 | 39846164  | 39846527  | Gm35191       |                                                             |
| chr5 | 41392763  | 41393238  | Gm35380       |                                                             |
| chr5 | 42972870  | 42973389  | LOC108169042  |                                                             |
| chr5 | 47052864  | 47053086  | Gm7931        |                                                             |
| chr5 | 49816596  | 49817205  | Gm40299       |                                                             |
| chr5 | 49817321  | 49817465  | Gm40299       |                                                             |
| chr5 | 49965735  | 49966157  | Adgra3        |                                                             |

|      |           |           |               |                                                                  |
|------|-----------|-----------|---------------|------------------------------------------------------------------|
| chr5 | 59038584  | 59038732  | Gm40306       |                                                                  |
| chr5 | 62933472  | 62933546  | Dthd1         | Dthd1                                                            |
| chr5 | 63364618  | 63365148  | Gm30837       |                                                                  |
| chr5 | 69158666  | 69159201  | Kctd8         |                                                                  |
| chr5 | 70339029  | 70339065  | Gabrg1        |                                                                  |
| chr5 | 71721892  | 71722167  | Gm38562       | Cox7b2;Gabra4;Gabrb1                                             |
| chr5 | 78622131  | 78622803  | Gm34912       |                                                                  |
| chr5 | 86782614  | 86783276  | Ythdc1        | Tmprss11b;Tmprss11e;Tmprss11f;<br>Ugt2b1;Ugt2b34                 |
| chr5 | 87469443  | 87469528  | Ugt2a2        | Csn1s1;Mir3969;Sult1b1;Sult1d1;Sult1e1;<br>Ugt2a1;Ugt2a3;Ugt2b38 |
| chr5 | 92053064  | 92053307  | Gm42111       | Cdkl2;G3bp2;Ppof2;Rchy1;Thap6;<br>U90926;Uso1                    |
| chr5 | 92936247  | 92936410  | Shroom3       | Mir1961;Sept11;Sowahb                                            |
| chr5 | 96691315  | 96691847  | Gm32995       | Anxa3;Fras1                                                      |
| chr5 | 97697605  | 97698057  | Gm34029       |                                                                  |
| chr5 | 111577530 | 111577640 | C130026L21Rik | Mn1                                                              |
| chr5 | 112371974 | 112372146 | Gm20636       | Asphd2;Cryba4;Crybb1;Hps4;Miat;Srrd;<br>Tfip11;Tpst2             |
| chr5 | 116330853 | 116331093 | B230112J18Rik | Ccdc60;Hspb8;Srrm4;Srrm4os                                       |
| chr5 | 129493620 | 129493644 | Gm34468       | Mmp17;Sfswap;Zfp11                                               |
| chr5 | 138380788 | 138381188 | Pvrig         | Cnpy4;Gal3st4;Gpc2;Lamtor4;Mblac1;<br>Nxpe5;Stag3;Taf6;Zfp157    |
| chr6 | 4355170   | 4355489   | Gm33788       | Col1a2                                                           |
| chr6 | 6369770   | 6369993   | Gm34749       | Slc25a13                                                         |
| chr6 | 7085501   | 7085781   | Sdhaf3        |                                                                  |
| chr6 | 7158790   | 7158817   | Gm19272       |                                                                  |
| chr6 | 12712957  | 12713019  | Thsd7a        |                                                                  |
| chr6 | 13687572  | 13687581  | Bmt2          | Gpr85;Tmem168                                                    |
| chr6 | 15499180  | 15499412  | Gm36352       |                                                                  |
| chr6 | 15777033  | 15777349  | Mdfic         |                                                                  |
| chr6 | 16920041  | 16920369  | Tfec          | Tes                                                              |
| chr6 | 16978490  | 16978606  | Tfec          | Tes                                                              |
| chr6 | 18996028  | 18996062  | Ankrd7        | Lsm8                                                             |
| chr6 | 22349626  | 22349861  | Fam3c         | Wnt16                                                            |
| chr6 | 23307103  | 23307249  | Fezf1         | Aass                                                             |
| chr6 | 24249267  | 24249452  | Slc13a1       |                                                                  |
| chr6 | 24628628  | 24628778  | Lmod2         | Asb15;Hyal4;Hyal6;Iqub;Ndufa5;Spam1;Wasl                         |

|      |           |           |              |                                                                             |
|------|-----------|-----------|--------------|-----------------------------------------------------------------------------|
| chr6 | 32863551  | 32864316  | Chchd3       |                                                                             |
| chr6 | 40895455  | 40895787  | Prss58       | Moxd2                                                                       |
| chr6 | 42862652  | 42863068  | Olfr449      | Olfr38;Olfr444;Olfr446;Olfr447;<br>Olfr448;;Olfr450;Olfr452;Olfr453;Tcaf1   |
| chr6 | 43299610  | 43299860  | Nobox        | Arhgef5;Olfr13;Olfr237-ps1;Olfr434;<br>Olfr435;Olfr437;Olfr441;Olfr47       |
| chr6 | 43879755  | 43880076  | Gm35163      |                                                                             |
| chr6 | 44179942  | 44180190  | Gm35216      |                                                                             |
| chr6 | 44571975  | 44571998  | Cntnap2      |                                                                             |
| chr6 | 54701734  | 54701983  | Mturn        | Fkbp14;Plekha8;Scrn1;Znrf2                                                  |
| chr6 | 60217857  | 60217973  | LOC108169190 |                                                                             |
| chr6 | 60441449  | 60441968  | Gm38823      |                                                                             |
| chr6 | 64865296  | 64865595  | Gm35851      | Atoh1;Smarcad1                                                              |
| chr6 | 64910587  | 64910945  | Smarcad1     | Atoh1                                                                       |
| chr6 | 64910587  | 64910945  | Atoh1        | Smarcad1                                                                    |
| chr6 | 74121743  | 74122203  | Gm31747      |                                                                             |
| chr6 | 81385654  | 81385831  | Gm38838      |                                                                             |
| chr6 | 82358355  | 82358792  | Tacr1        |                                                                             |
| chr6 | 91408570  | 91409013  | Wnt7a        | Chchd4;Fbln2;Gm30437;Lsm3;Tmem43;Xpc                                        |
| chr6 | 103119970 | 103120120 | Mir6373      |                                                                             |
| chr6 | 106719623 | 106719748 | Il5ra        | Crbn;Trnt1                                                                  |
| chr6 | 106719836 | 106720023 | Il5ra        | Crbn;Trnt1                                                                  |
| chr6 | 107495920 | 107495980 | Lrrn1        |                                                                             |
| chr6 | 128543268 | 128543615 | Pzp          | Clec2h;Clec2j;Fkbp4;Foxm1;Itfg2;Klrb1;<br>Klrb1a;Nrip2;Rhno1;Tulp3          |
| chr6 | 138246577 | 138246876 | Gm30213      | Lmo3;Mgst1;Slc15a5                                                          |
| chr6 | 138325245 | 138325442 | Lmo3         | Mgst1                                                                       |
| chr6 | 138597146 | 138597168 | Lmo3         | Mgst2                                                                       |
| chr6 | 146404558 | 146404605 | Itpr2        |                                                                             |
| chr7 | 16668681  | 16668767  | Ceacam15     | Ap2s1;Arhgap35;Ceacam-ps1;Ceacam9;<br>Fkrp;Gm29443;Npas1;Prkd2;Slc1a5;Strn4 |
| chr7 | 18496116  | 18496434  | Psg26        | Psg18;Psg20;Psg21;Psg23;Psg25;<br>Psg27;Psg28                               |
| chr7 | 18687775  | 18688016  | Psg20        | Mill2;Pglyrp1;Psg17;Psg19;Psg21;<br>Psg22;Psg23;Psg25;Psg27;Symp1-ps1       |

|      |           |           |               |                                                                                                                                             |
|------|-----------|-----------|---------------|---------------------------------------------------------------------------------------------------------------------------------------------|
| chr7 | 31025342  | 31025926  | Gm42377       | Fam187b;Ffar1;Ffar3;Fxyd1;Fxyd3;<br>Fxyd5;Fxyd7;Gramd1a;Hamp;Hamp2;<br>Hpn;Lgi4;Lsr;Mag;Mir7050;Scn1b;Usf2                                  |
| chr7 | 36244743  | 36244921  | LOC108167497  |                                                                                                                                             |
| chr7 | 46562841  | 46563329  | Sergef        | Munc;Myod1;Saa1;Saa2;Saa3;Saa4;<br>Saal1;Tph1                                                                                               |
| chr7 | 50261286  | 50261421  | Nell1         |                                                                                                                                             |
| chr7 | 56976358  | 56976524  | Gm39017       |                                                                                                                                             |
| chr7 | 65454218  | 65454480  | Tjp1          | Tarsl2                                                                                                                                      |
| chr7 | 65454534  | 65454748  | Tjp1          | Tarsl3                                                                                                                                      |
| chr7 | 88162952  | 88163157  | Ctsc          |                                                                                                                                             |
| chr7 | 88341437  | 88341539  | Ctsc          | Rab38                                                                                                                                       |
| chr7 | 88526908  | 88527574  | Rab38         |                                                                                                                                             |
| chr7 | 88946696  | 88946981  | Tmem135       |                                                                                                                                             |
| chr7 | 93855307  | 93855489  | Gm32647       |                                                                                                                                             |
| chr7 | 94096864  | 94097145  | Gm32647       |                                                                                                                                             |
| chr7 | 99045699  | 99045882  | Uvrag         | Dgat2;Mogat2                                                                                                                                |
| chr7 | 101409123 | 101409188 | Pde2a         | Arap1;Art2a-ps;Art2b;Atg16l2;<br>Mir139;Stard10                                                                                             |
| chr7 | 104930410 | 104930610 | Olfr668       | Olfr665;Olfr666;Olfr667;Olfr669;<br>Olfr670;Olfr671;Olfr672;Olfr675;<br>Olfr676;Olfr677;Olfr678;Olfr679;<br>Olfr681;Usp17la;Usp17lb;Usp17le |
| chr7 | 106691450 | 106691462 | Olfr694       | Olfr693;Olfr695;Olfr697;Olfr698;<br>Olfr699;Olfr700;Olfr701;Olfr702;<br>Olfr703;Olfr704;Olfr705;Olfr706                                     |
| chr7 | 132166601 | 132167480 | Cpxm2         | Chst15                                                                                                                                      |
| chr8 | 18807212  | 18807582  | Agpat5        | Angpt2;Defb37;Defb40;Mcph1;Xkr5                                                                                                             |
| chr8 | 21012074  | 21012268  | Defa21        | AY761185;Defa22;Defa23;Defa25;<br>Defa30;Defa31;Defa35;Defb33                                                                               |
| chr8 | 28705520  | 28705621  | Gm32505       |                                                                                                                                             |
| chr8 | 28781023  | 28781601  | Gm32505       |                                                                                                                                             |
| chr8 | 36092063  | 36092388  | D8Ertd82e     | Lonrf1                                                                                                                                      |
| chr8 | 42012604  | 42012807  | 2810404M03Rik |                                                                                                                                             |
| chr8 | 42012896  | 42013134  | 2810404M03Rik |                                                                                                                                             |
| chr8 | 43402949  | 43403277  | Gm40498       | Adam26a;Adam26b;Zfp42                                                                                                                       |
| chr8 | 50704365  | 50704543  | 1700019L22Rik |                                                                                                                                             |
| chr8 | 53842813  | 53842950  | Neil3         |                                                                                                                                             |
| chr8 | 53997566  | 53997792  | Vegfc         |                                                                                                                                             |
| chr8 | 54160544  | 54160669  | Gm33153       | Vegfc                                                                                                                                       |
| chr8 | 54828076  | 54828297  | Gpm6a         | Wdr17                                                                                                                                       |

|      |           |           |          |                                                                                     |
|------|-----------|-----------|----------|-------------------------------------------------------------------------------------|
| chr8 | 60755864  | 60756008  | Mfap3l   | Clcn3;Hpf1                                                                          |
| chr8 | 60756095  | 60756382  | Mfap3l   | Clcn3;Hpf2                                                                          |
| chr8 | 63079219  | 63079258  | Spock3   |                                                                                     |
| chr8 | 63651606  | 63651653  | Gm35424  |                                                                                     |
| chr8 | 63825137  | 63825457  | Gm35424  | Sgol2b                                                                              |
| chr8 | 65355786  | 65355906  | BC030870 |                                                                                     |
| chr8 | 65356291  | 65356365  | BC030870 |                                                                                     |
| chr8 | 65557413  | 65557749  | March1   |                                                                                     |
| chr8 | 68275398  | 68275550  | Sh2d4a   | Psd3;Sh2d4a                                                                         |
| chr8 | 78162088  | 78162274  | Gm39202  | Ttc29                                                                               |
| chr8 | 80252152  | 80252307  | Gm39208  | Hhip                                                                                |
| chr8 | 82418759  | 82419137  | Il15     |                                                                                     |
| chr8 | 82473259  | 82473566  | Il15     |                                                                                     |
| chr8 | 89512595  | 89512649  | Gm35593  |                                                                                     |
| chr8 | 95360372  | 95360611  | Mmp15    | Ccdc113;Cfap20;Cngb1;Csnk2a2;<br>Kifc3;Tepp;Usb1;Zfp319                             |
| chr8 | 98861232  | 98861386  | Gm15679  | Cdh8                                                                                |
| chr8 | 100499701 | 100500059 | Gm39232  |                                                                                     |
| chr8 | 100939824 | 100939845 | Gm39232  |                                                                                     |
| chr8 | 101422589 | 101423032 | Gm32423  |                                                                                     |
| chr8 | 104088249 | 104088428 | Cdh5     | Bean1;Cklf;Tk2                                                                      |
| chr8 | 115597623 | 115597794 | Gm39256  | Maf                                                                                 |
| chr8 | 118793886 | 118794073 | Cdh13    |                                                                                     |
| chr9 | 7596722   | 7597011   | Gm31751  | Mir5618;Mmp10;Mmp1a;Mmp20;<br>Mmp27;Mmp3;Mmp7;Mmp8;Tmem123                          |
| chr9 | 9996675   | 9996885   | Gm39289  | Mir6237                                                                             |
| chr9 | 10682488  | 10682666  | Cntn5    |                                                                                     |
| chr9 | 16685228  | 16685779  | Fat3     |                                                                                     |
| chr9 | 21669935  | 21670307  | Smarca4  | Angptl8;Carm1;Dock6;Kank2;Ldlr;<br>Mir1946b;Mir199a-1;Mir7083;Spc24;<br>Tmed1;Yipf2 |
| chr9 | 22669194  | 22669431  | Gm39309  | Bbs9                                                                                |
| chr9 | 37183119  | 37183406  | Tmem218  | Ccdc15;Hepacam;Pknox2;Slc37a2                                                       |
| chr9 | 76878880  | 76878982  | Gm34158  | Tinag                                                                               |
| chr9 | 77092674  | 77093184  | Tinag    | Mlip                                                                                |
| chr9 | 84566695  | 84566978  | Gm39388  |                                                                                     |
| chr9 | 87994269  | 87994437  | Gm36767  |                                                                                     |
| chr9 | 88332500  | 88332917  | Nt5e     | Snhg5;Snx14;Syncrip                                                                 |

|      |           |           |               |                                                                                                                                              |
|------|-----------|-----------|---------------|----------------------------------------------------------------------------------------------------------------------------------------------|
| chr9 | 89267912  | 89268262  | Mthfs         | Bcl2a1b;Mthfs;Trim43b                                                                                                                        |
| chr9 | 90490905  | 90491070  | Gm39398       |                                                                                                                                              |
| chr9 | 97702946  | 97703278  | 4921534H16Rik |                                                                                                                                              |
| chr9 | 107511290 | 107511317 | Gm34037       | Cacna2d2;Cyb561d2;Gnai2;Gnat1;Hemk1;<br>Hyal1;Hyal2;Hyal3;lfrd2;Lsmem2;Nat6;Nprl2;<br>Rassf1;Sema3b;Sema3f;Slc38a3;Tmem115;<br>Tusc2;Zmynd10 |
| chr9 | 109006980 | 109007017 | Pfkfb4        | Atrip;Ccadc51;Celsr3;Col7a1;Fbxw13;Fbxw21;<br>Mir711;Nckips;Plxnb1;Shisa5;Slc26a6;Tma7;<br>Tmem89;Trex1;Ucn2;Uqcrc1                          |
| chr9 | 118083000 | 118083076 | Azi2          | Cmc1;Rbms3                                                                                                                                   |
| chr9 | 118964683 | 118964959 | Ctdspl        | Acaa1b;Dlec1;Mir26a-1;Plcd1;Vill                                                                                                             |
| chrX | 141436919 | 141437080 | Col4a6        | Col4a5                                                                                                                                       |
| chrX | 164944727 | 164944940 | Mospd2        | Fancb                                                                                                                                        |
| chrY | 90740328  | 90740592  | LOC108168534  |                                                                                                                                              |
